# Supplementary material for: Enantioselective formal synthesis of uleine alkaloids from phenylglycinol-derived bicyclic lactams
Source: Royal Society of Chemistry journal article supplement (doi:10.1039/b400987h), 2004-01-01

# ELECTRONIC SUPPLEMENTARY INFORMATION (ESI)

## Enantioselective formal synthesis of uleine alkaloids from phenylglycinol-derived bicyclic lactams

Mercedes Amat,<sup>\*a</sup> Maria Pérez,<sup>a</sup> Núria Llor,<sup>a</sup> Marisa Martinelli,<sup>a</sup> Elies Molins,<sup>b</sup> and Joan Bosch<sup>\*a</sup>

<sup>a</sup> *Laboratory of Organic Chemistry, Faculty of Pharmacy, University of Barcelona, 08028-Barcelona, Spain*

<sup>b</sup> *Institut de Ciència de Materials (CSIC), Campus UAB, 08193-Cerdanyola, Spain.*

### Contents:

- Complete X-ray crystallographic data for ( $\alpha R$ )-**8a**
- <sup>1</sup>H and <sup>13</sup>C NMR spectra of new compounds

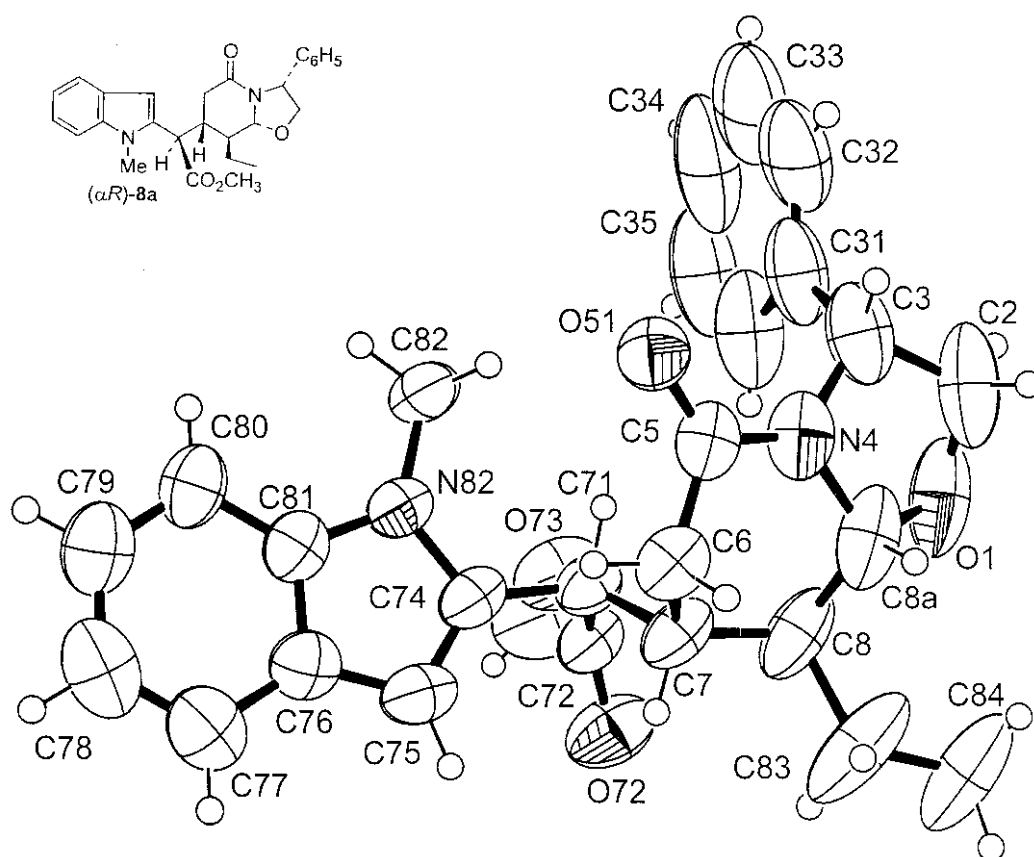

Table 1. Crystal data and structure refinement for ( $\alpha R$ )-**8a**.

|                                   |                                                               |                       |
|-----------------------------------|---------------------------------------------------------------|-----------------------|
| Identification code               | <b>(<math>\alpha R</math>)-8a</b>                             |                       |
| Empirical formula                 | C <sub>27</sub> H <sub>30</sub> N <sub>2</sub> O <sub>4</sub> |                       |
| Formula weight                    | 446.53                                                        |                       |
| Temperature                       | 294(2) K                                                      |                       |
| Wavelength                        | 0.71073 Å                                                     |                       |
| Crystal system                    | Orthorhombic                                                  |                       |
| Space group                       | P 21 21 21                                                    |                       |
| Unit cell dimensions              | a = 8.931(2) Å                                                | $\alpha = 90^\circ$ . |
|                                   | b = 9.5990(10) Å                                              | $\beta = 90^\circ$ .  |
|                                   | c = 28.080(9) Å                                               | $\gamma = 90^\circ$ . |
| Volume                            | 2407.3(10) Å <sup>3</sup>                                     |                       |
| Z                                 | 4                                                             |                       |
| Density (calculated)              | 1.232 Mg/m <sup>3</sup>                                       |                       |
| Absorption coefficient            | 0.083 mm <sup>-1</sup>                                        |                       |
| F(000)                            | 952                                                           |                       |
| Crystal size                      | 0.69 x 0.36 x 0.12 mm <sup>3</sup>                            |                       |
| Theta range for data collection   | 2.24 to 28.44°.                                               |                       |
| Index ranges                      | 0 < = h < = 11, -12 < = k < = 0, 0 < = l < = 37               |                       |
| Reflections collected             | 3440                                                          |                       |
| Independent reflections           | 3440                                                          |                       |
| Completeness to theta = 28.44°    | 100.0 %                                                       |                       |
| Max. and min. transmission        | 0.9901 and 0.9451                                             |                       |
| Refinement method                 | Full-matrix least-squares on F <sup>2</sup>                   |                       |
| Data / restraints / parameters    | 3440 / 1 / 312                                                |                       |
| Goodness-of-fit on F <sup>2</sup> | 0.968                                                         |                       |
| Final R indices [I > 2sigma(I)]   | R1 = 0.0458, wR2 = 0.1321                                     |                       |
| R indices (all data)              | R1 = 0.0981, wR2 = 0.1451                                     |                       |
| Absolute structure parameter      | 4(2)                                                          |                       |
| Extinction coefficient            | 0.0074(17)                                                    |                       |
| Largest diff. peak and hole       | 0.165 and -0.197 e.Å <sup>-3</sup>                            |                       |

Table 2. Atomic coordinates ( $\times 10^4$ ) and equivalent isotropic displacement parameters ( $\text{\AA}^{-2} \times 10^3$ ) for (*oR*)-**8a**.  $U(\text{eq})$  is defined as one third of the trace of the orthogonalized  $U^{ij}$  tensor.

|       | x       | y        | z       | U(eq)  |
|-------|---------|----------|---------|--------|
| N(4)  | 4283(3) | 2311(3)  | 8595(1) | 78(1)  |
| N(82) | 5079(3) | 7284(2)  | 8433(1) | 59(1)  |
| O(1)  | 2846(3) | 1131(3)  | 9118(1) | 116(1) |
| O(51) | 5519(2) | 3473(2)  | 8021(1) | 71(1)  |
| O(72) | 3211(3) | 6122(3)  | 9810(1) | 98(1)  |
| O(73) | 1845(3) | 6527(3)  | 9165(1) | 100(1) |
| C(2)  | 2749(5) | 397(4)   | 8673(2) | 124(2) |
| C(3)  | 3289(4) | 1445(3)  | 8303(2) | 96(1)  |
| C(31) | 2038(4) | 2245(4)  | 8064(2) | 102(1) |
| C(32) | 1658(5) | 1913(5)  | 7593(2) | 131(2) |
| C(33) | 430(7)  | 2534(6)  | 7386(3) | 160(2) |
| C(34) | -379(7) | 3478(6)  | 7640(4) | 175(3) |
| C(35) | -30(6)  | 3877(5)  | 8096(3) | 153(2) |
| C(36) | 1230(4) | 3225(4)  | 8319(2) | 123(2) |
| C(5)  | 5340(3) | 3191(3)  | 8441(1) | 62(1)  |
| C(6)  | 6221(3) | 3830(3)  | 8837(1) | 68(1)  |
| C(7)  | 5159(3) | 4329(3)  | 9239(1) | 69(1)  |
| C(71) | 4185(3) | 5512(3)  | 9036(1) | 62(1)  |
| C(73) | 729(5)  | 7224(6)  | 9452(2) | 143(2) |
| C(74) | 5128(3) | 6732(3)  | 8888(1) | 62(1)  |
| C(82) | 4117(4) | 6822(3)  | 8044(1) | 75(1)  |
| C(75) | 6127(3) | 7463(3)  | 9157(1) | 74(1)  |
| C(77) | 7790(3) | 9585(3)  | 8936(1) | 85(1)  |
| C(78) | 8132(4) | 10461(4) | 8556(2) | 94(1)  |
| C(79) | 7438(4) | 10281(4) | 8118(1) | 88(1)  |
| C(80) | 6414(4) | 9266(3)  | 8036(1) | 76(1)  |
| C(81) | 6071(3) | 8382(3)  | 8414(1) | 63(1)  |
| C(76) | 6739(3) | 8522(3)  | 8866(1) | 68(1)  |
| C(72) | 3049(4) | 6051(3)  | 9395(1) | 68(1)  |
| C(8)  | 4268(4) | 3088(4)  | 9440(1) | 90(1)  |
| C(8A) | 4222(4) | 1870(3)  | 9095(1) | 92(1)  |

|        |          |          |          |        |
|--------|----------|----------|----------|--------|
| C(83)  | 4975(6)  | 2591(6)  | 9919(2)  | 144(2) |
| C(84)  | 4373(8)  | 1484(9)  | 10193(2) | 149(3) |
| C(83A) | 4975(6)  | 2591(6)  | 9919(2)  | 144(2) |
| C(84A) | 4449(17) | 3133(19) | 10313(4) | 125(5) |

Table 3. Bond lengths [ $\text{\AA}$ ] and angles [ $^\circ$ ] for ( $\alpha R$ )-**8a**.

---

|             |           |
|-------------|-----------|
| N(4)-C(5)   | 1.338(4)  |
| N(4)-C(3)   | 1.468(4)  |
| N(4)-C(8A)  | 1.467(4)  |
| N(82)-C(81) | 1.378(4)  |
| N(82)-C(74) | 1.383(3)  |
| N(82)-C(82) | 1.459(3)  |
| O(1)-C(8A)  | 1.421(4)  |
| O(1)-C(2)   | 1.439(5)  |
| O(51)-C(5)  | 1.221(3)  |
| O(72)-C(72) | 1.176(3)  |
| O(73)-C(72) | 1.335(4)  |
| O(73)-C(73) | 1.446(4)  |
| C(2)-C(3)   | 1.524(5)  |
| C(3)-C(31)  | 1.513(5)  |
| C(31)-C(36) | 1.386(6)  |
| C(31)-C(32) | 1.400(7)  |
| C(32)-C(33) | 1.377(7)  |
| C(33)-C(34) | 1.362(8)  |
| C(34)-C(35) | 1.371(11) |
| C(35)-C(36) | 1.433(7)  |
| C(5)-C(6)   | 1.494(4)  |
| C(6)-C(7)   | 1.551(4)  |
| C(7)-C(8)   | 1.539(4)  |
| C(7)-C(71)  | 1.540(4)  |
| C(71)-C(74) | 1.500(4)  |
| C(71)-C(72) | 1.522(4)  |
| C(74)-C(75) | 1.362(4)  |
| C(75)-C(76) | 1.414(4)  |
| C(77)-C(78) | 1.392(5)  |
| C(77)-C(76) | 1.400(4)  |
| C(78)-C(79) | 1.390(5)  |
| C(79)-C(80) | 1.356(5)  |
| C(80)-C(81) | 1.393(4)  |
| C(81)-C(76) | 1.410(4)  |

|                   |            |
|-------------------|------------|
| C(8)-C(8A)        | 1.519(5)   |
| C(8)-C(83)        | 1.560(5)   |
| C(83)-C(84)       | 1.418(8)   |
|                   |            |
| C(5)-N(4)-C(3)    | 127.1(3)   |
| C(5)-N(4)-C(8A)   | 121.2(3)   |
| C(3)-N(4)-C(8A)   | 110.5(3)   |
| C(81)-N(82)-C(74) | 108.0(2)   |
| C(81)-N(82)-C(82) | 125.5(2)   |
| C(74)-N(82)-C(82) | 126.4(2)   |
| C(8A)-O(1)-C(2)   | 104.8(3)   |
| C(72)-O(73)-C(73) | 116.3(3)   |
| O(1)-C(2)-C(3)    | 104.5(3)   |
| N(4)-C(3)-C(31)   | 114.1(3)   |
| N(4)-C(3)-C(2)    | 100.6(3)   |
| C(31)-C(3)-C(2)   | 113.8(3)   |
| C(36)-C(31)-C(32) | 121.1(4)   |
| C(36)-C(31)-C(3)  | 120.0(5)   |
| C(32)-C(31)-C(3)  | 118.8(4)   |
| C(33)-C(32)-C(31) | 119.6(6)   |
| C(34)-C(33)-C(32) | 119.2(7)   |
| C(33)-C(34)-C(35) | 123.7(6)   |
| C(34)-C(35)-C(36) | 117.7(6)   |
| C(31)-C(36)-C(35) | 118.6(5)   |
| O(51)-C(5)-N(4)   | 123.0(3)   |
| O(51)-C(5)-C(6)   | 124.0(3)   |
| N(4)-C(5)-C(6)    | 113.0(3)   |
| C(5)-C(6)-C(7)    | 110.3(2)   |
| C(8)-C(7)-C(71)   | 114.5(2)   |
| C(8)-C(7)-C(6)    | 110.1(2)   |
| C(71)-C(7)-C(6)   | 107.59(19) |
| C(74)-C(71)-C(72) | 107.0(2)   |
| C(74)-C(71)-C(7)  | 111.2(2)   |
| C(72)-C(71)-C(7)  | 112.4(2)   |
| C(75)-C(74)-N(82) | 109.5(2)   |
| C(75)-C(74)-C(71) | 128.1(2)   |

|                   |          |
|-------------------|----------|
| N(82)-C(74)-C(71) | 122.4(3) |
| C(74)-C(75)-C(76) | 107.7(2) |
| C(78)-C(77)-C(76) | 118.7(3) |
| C(79)-C(78)-C(77) | 120.4(4) |
| C(80)-C(79)-C(78) | 122.7(3) |
| C(79)-C(80)-C(81) | 117.2(3) |
| N(82)-C(81)-C(80) | 129.6(3) |
| N(82)-C(81)-C(76) | 108.0(2) |
| C(80)-C(81)-C(76) | 122.3(3) |
| C(77)-C(76)-C(81) | 118.7(3) |
| C(77)-C(76)-C(75) | 134.6(3) |
| C(81)-C(76)-C(75) | 106.7(3) |
| O(72)-C(72)-O(73) | 124.0(3) |
| O(72)-C(72)-C(71) | 126.5(3) |
| O(73)-C(72)-C(71) | 109.4(2) |
| C(8A)-C(8)-C(7)   | 112.1(2) |
| C(8A)-C(8)-C(83)  | 109.0(3) |
| C(7)-C(8)-C(83)   | 110.0(4) |
| O(1)-C(8A)-N(4)   | 102.7(3) |
| O(1)-C(8A)-C(8)   | 112.2(3) |
| N(4)-C(8A)-C(8)   | 112.7(3) |
| C(84)-C(83)-C(8)  | 122.9(6) |



Table 4. Anisotropic displacement parameters ( $\text{\AA}^2 \times 10^3$ ) for (*αR*)-**8a**. The anisotropic displacement factor exponent takes the form:  $-2\pi^2 [ h^2 a^{*2} U^{11} + \dots + 2 h k a^* b^* U^{12} ]$

|       | $U^{11}$ | $U^{22}$ | $U^{33}$ | $U^{23}$ | $U^{13}$ | $U^{12}$ |
|-------|----------|----------|----------|----------|----------|----------|
| N(4)  | 68(1)    | 67(1)    | 98(2)    | 9(1)     | 28(1)    | 9(1)     |
| N(82) | 64(1)    | 63(1)    | 49(1)    | 2(1)     | 0(1)     | 11(1)    |
| O(1)  | 101(2)   | 74(2)    | 174(3)   | 43(2)    | 66(2)    | 18(2)    |
| O(51) | 74(1)    | 74(1)    | 66(1)    | -3(1)    | 16(1)    | 2(1)     |
| O(72) | 105(2)   | 128(2)   | 60(1)    | 2(1)     | 19(1)    | 38(2)    |
| O(73) | 87(1)    | 131(2)   | 83(1)    | -5(1)    | 9(1)     | 51(2)    |
| C(2)  | 96(3)    | 58(2)    | 218(5)   | 26(3)    | 48(3)    | 12(2)    |
| C(3)  | 71(2)    | 63(2)    | 153(3)   | -2(2)    | 26(2)    | 2(2)     |
| C(31) | 61(2)    | 65(2)    | 181(4)   | 11(3)    | 20(2)    | -13(2)   |
| C(32) | 94(3)    | 86(3)    | 212(5)   | 11(4)    | -13(3)   | -33(3)   |
| C(33) | 119(4)   | 104(4)   | 258(7)   | 39(4)    | -52(5)   | -43(4)   |
| C(34) | 95(4)    | 81(3)    | 350(11)  | 47(6)    | -29(6)   | -21(3)   |
| C(35) | 90(3)    | 81(3)    | 287(8)   | 25(5)    | 29(4)    | -10(3)   |
| C(36) | 68(2)    | 78(2)    | 225(5)   | 26(3)    | 27(3)    | 9(2)     |
| C(5)  | 54(1)    | 58(1)    | 75(2)    | 6(1)     | 18(1)    | 13(1)    |
| C(6)  | 59(1)    | 77(2)    | 69(2)    | 7(2)     | 10(1)    | 17(2)    |
| C(7)  | 72(2)    | 82(2)    | 54(1)    | 16(1)    | 13(1)    | 24(2)    |
| C(71) | 67(2)    | 67(2)    | 51(1)    | 3(1)     | 6(1)     | 14(2)    |
| C(73) | 123(3)   | 188(5)   | 118(3)   | -15(3)   | 19(3)    | 89(4)    |
| C(74) | 70(2)    | 67(2)    | 49(1)    | 5(1)     | 5(1)     | 19(2)    |
| C(82) | 96(2)    | 78(2)    | 52(1)    | 9(1)     | -10(1)   | 5(2)     |
| C(75) | 81(2)    | 86(2)    | 54(1)    | 1(2)     | -11(2)   | 8(2)     |
| C(77) | 72(2)    | 71(2)    | 112(2)   | -6(2)    | -12(2)   | 14(2)    |
| C(78) | 62(2)    | 69(2)    | 152(3)   | -7(2)    | 2(2)     | 9(2)     |
| C(79) | 75(2)    | 76(2)    | 113(3)   | 18(2)    | 10(2)    | 12(2)    |
| C(80) | 72(2)    | 67(2)    | 87(2)    | 16(2)    | 11(2)    | 10(2)    |
| C(81) | 60(1)    | 59(2)    | 69(2)    | 5(1)     | 4(1)     | 14(1)    |
| C(76) | 61(1)    | 68(2)    | 74(2)    | 1(2)     | -6(1)    | 13(2)    |
| C(72) | 78(2)    | 70(2)    | 57(2)    | 6(1)     | 9(1)     | 21(2)    |
| C(8)  | 87(2)    | 99(2)    | 83(2)    | 41(2)    | 36(2)    | 40(2)    |
| C(8A) | 81(2)    | 71(2)    | 123(3)   | 33(2)    | 49(2)    | 28(2)    |

|        |         |         |        |        |        |         |
|--------|---------|---------|--------|--------|--------|---------|
| C(83)  | 138(4)  | 196(5)  | 99(3)  | 87(3)  | 43(3)  | 67(4)   |
| C(84)  | 126(5)  | 180(7)  | 140(5) | 108(6) | 27(4)  | 33(5)   |
| C(83A) | 138(4)  | 196(5)  | 99(3)  | 87(3)  | 43(3)  | 67(4)   |
| C(84A) | 116(11) | 161(15) | 97(9)  | 7(10)  | -39(9) | -22(12) |

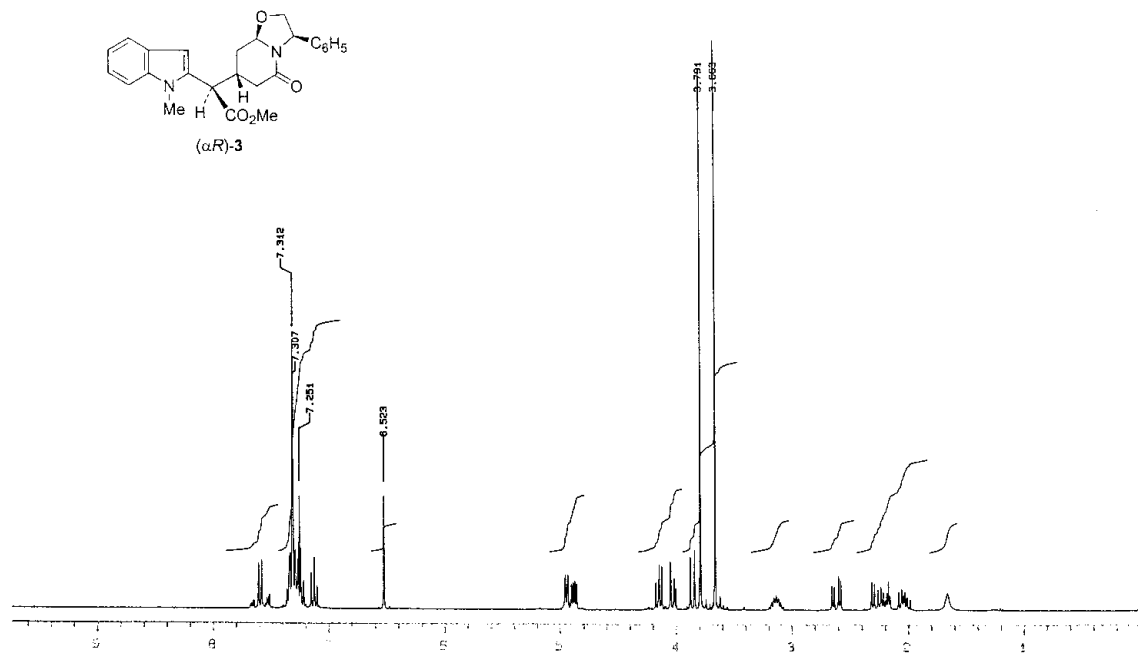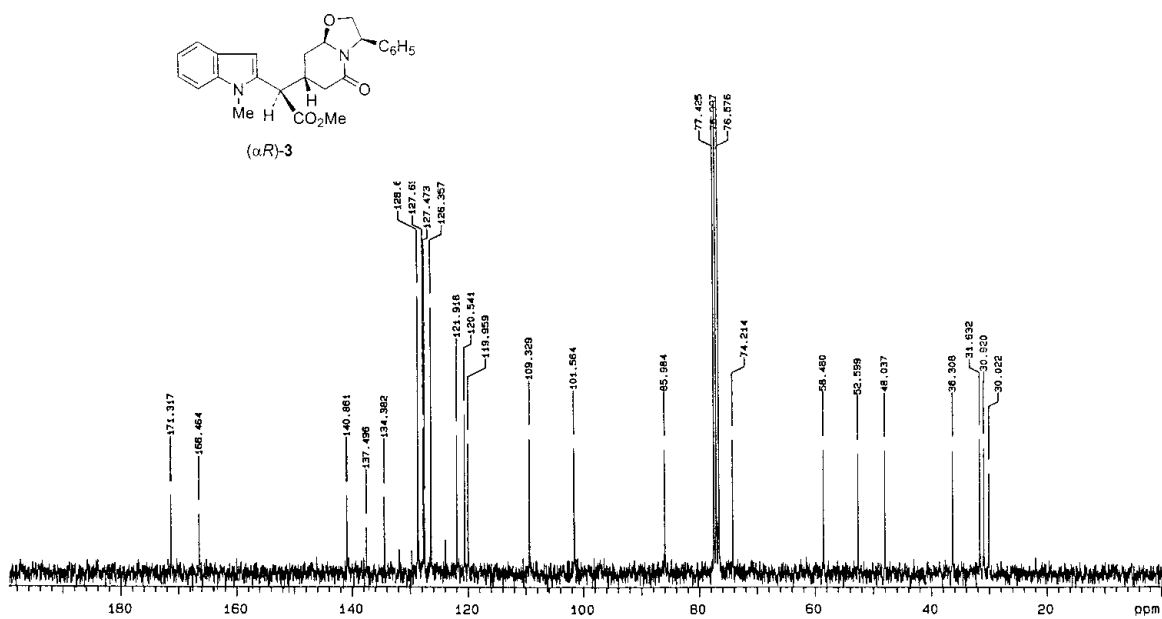

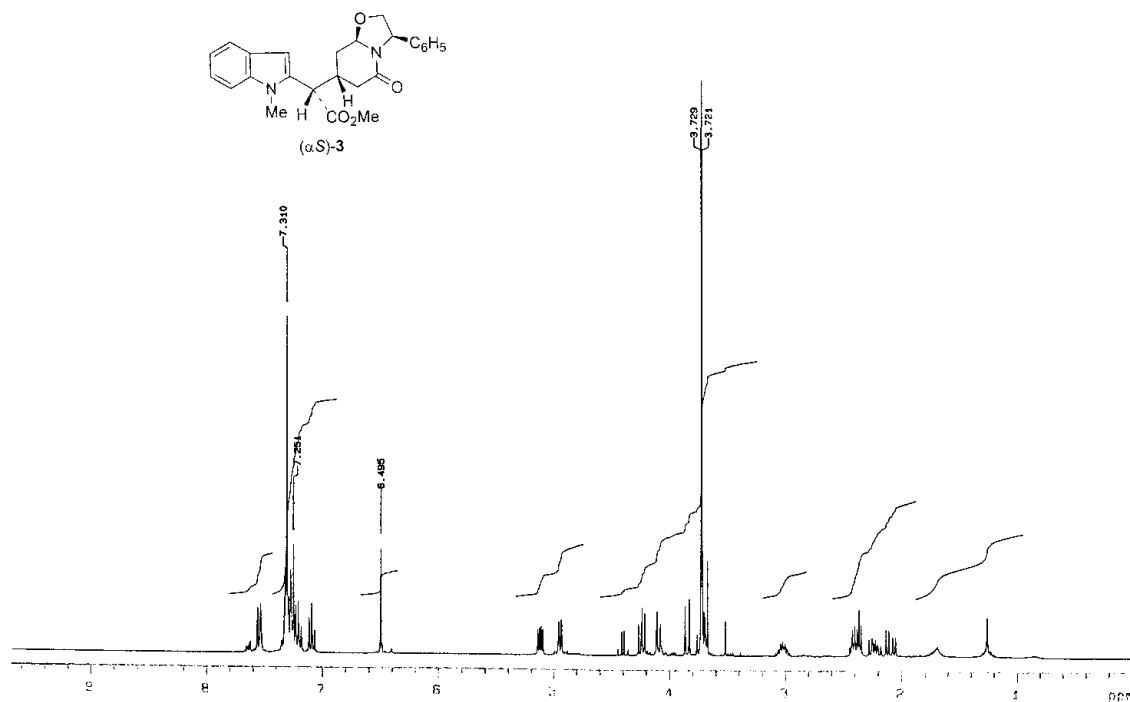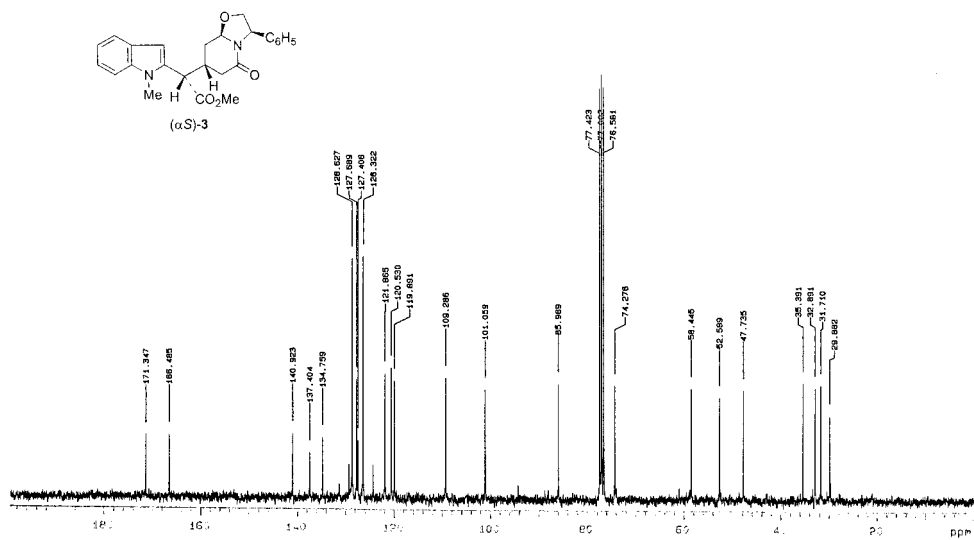

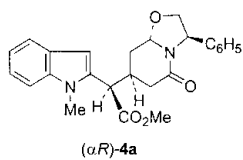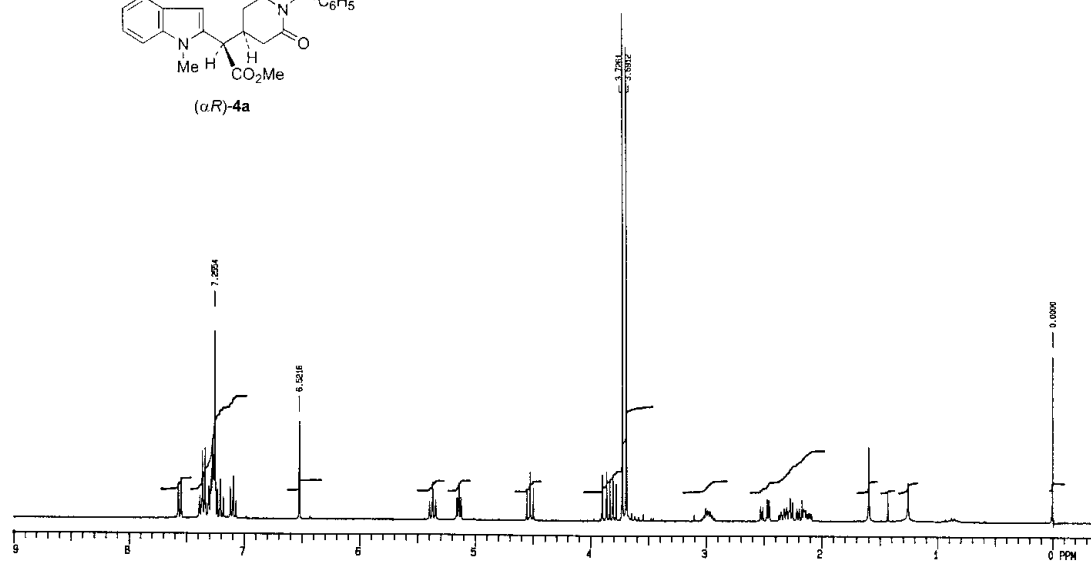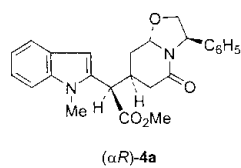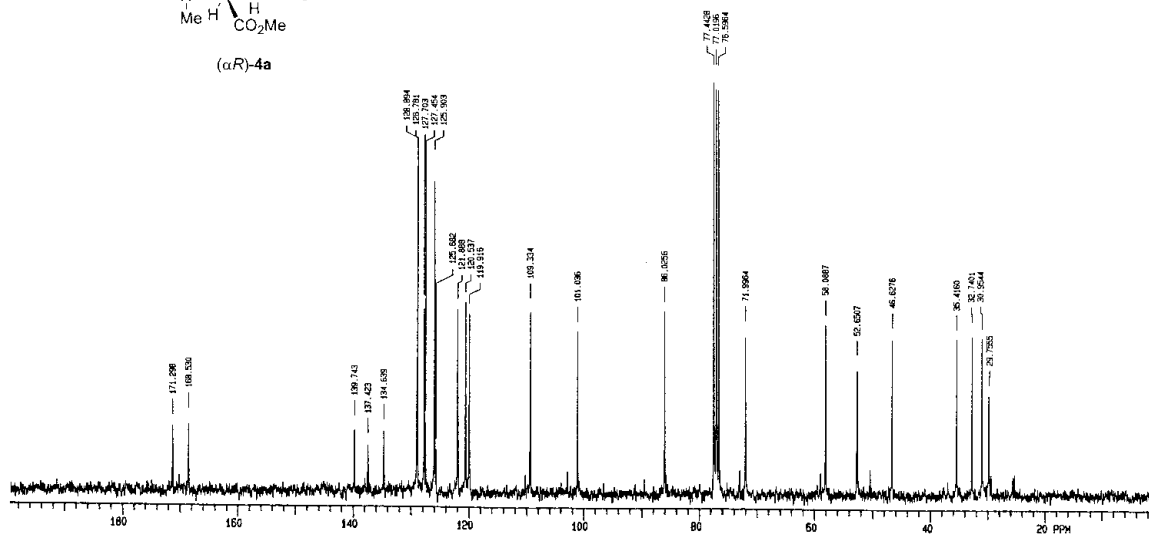

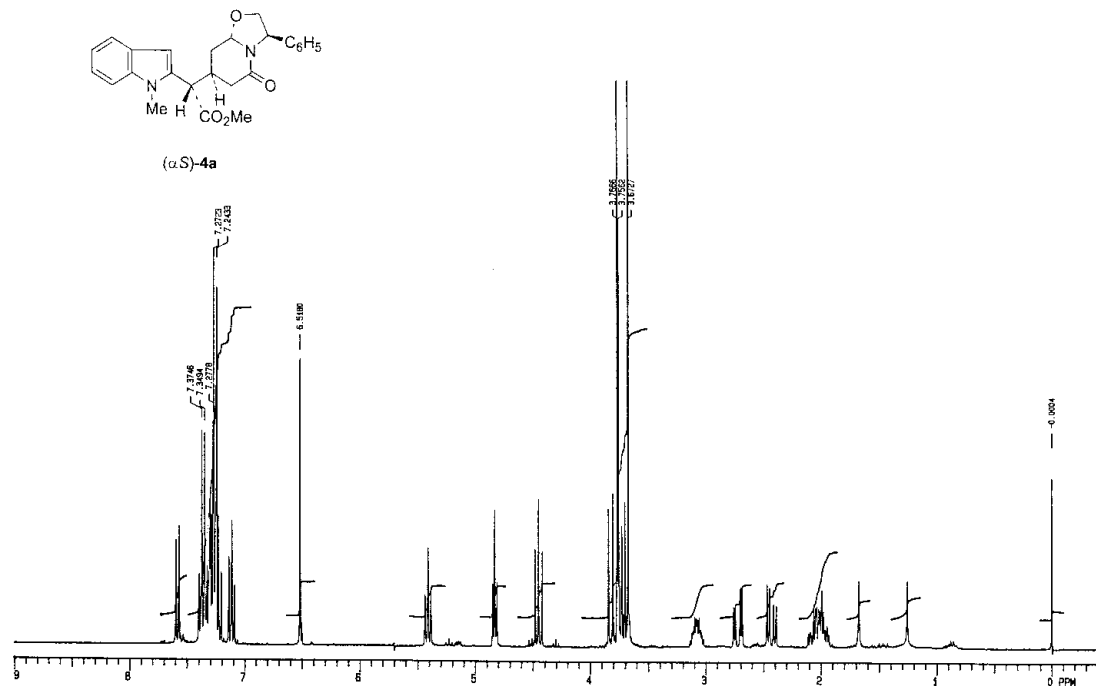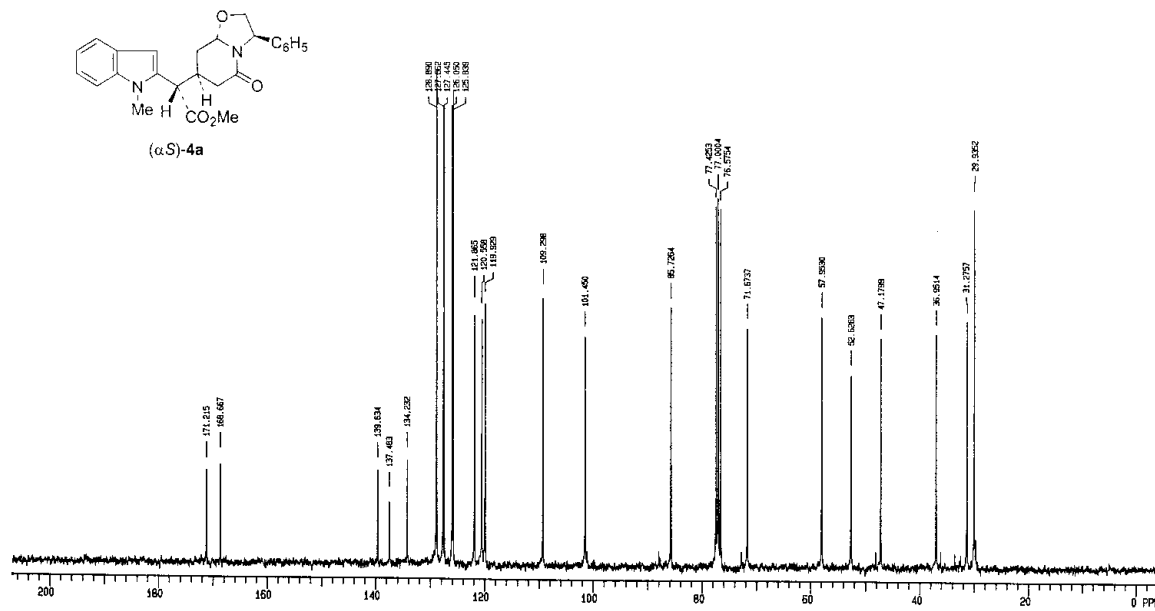

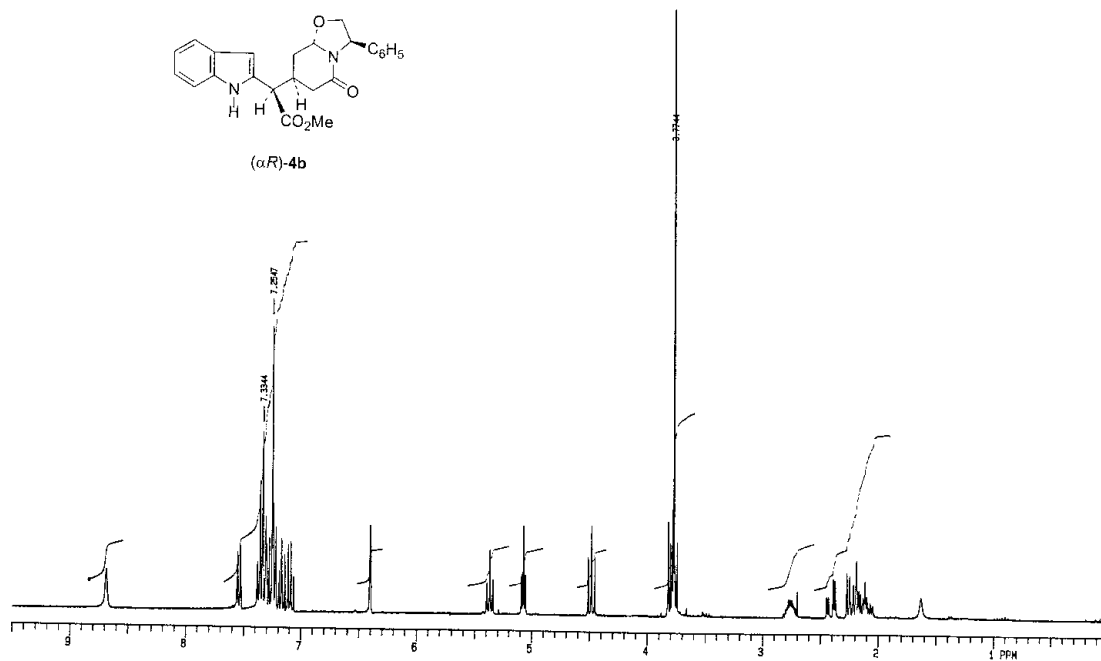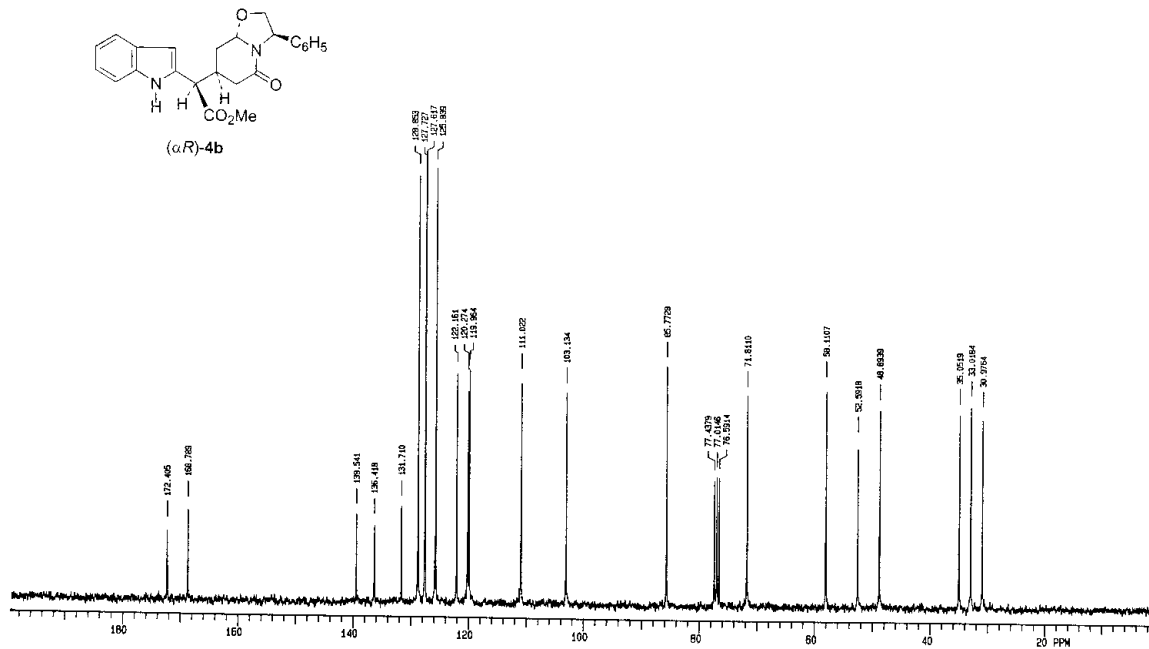

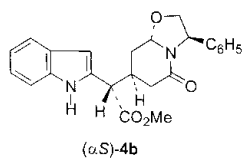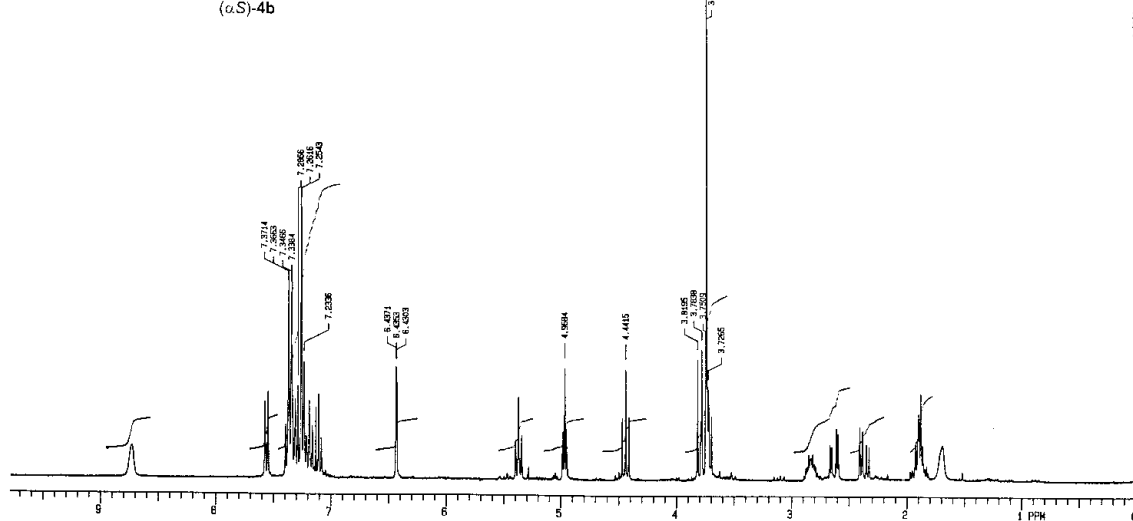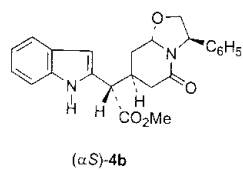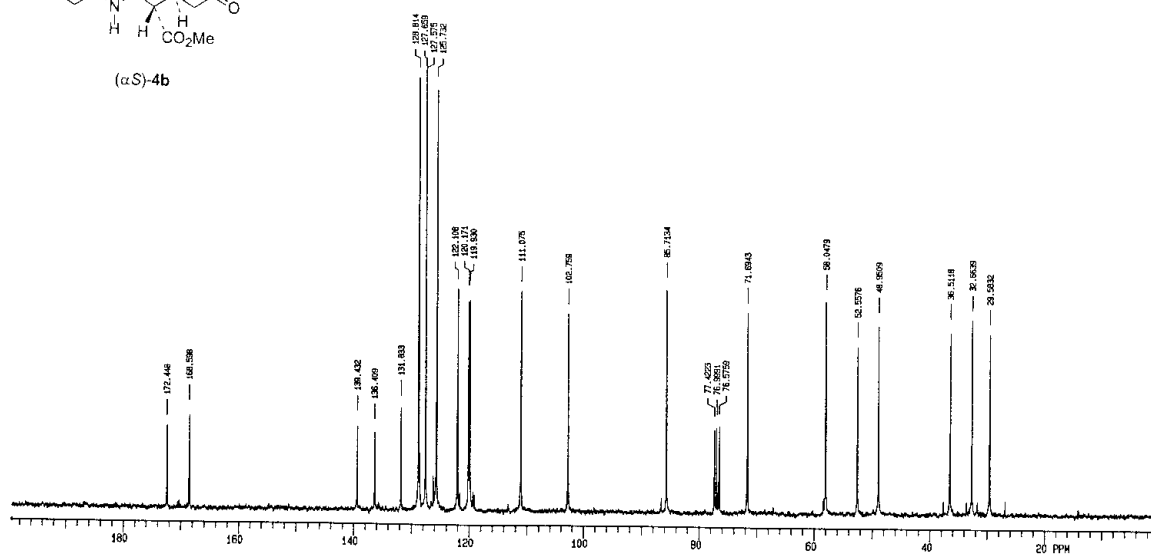



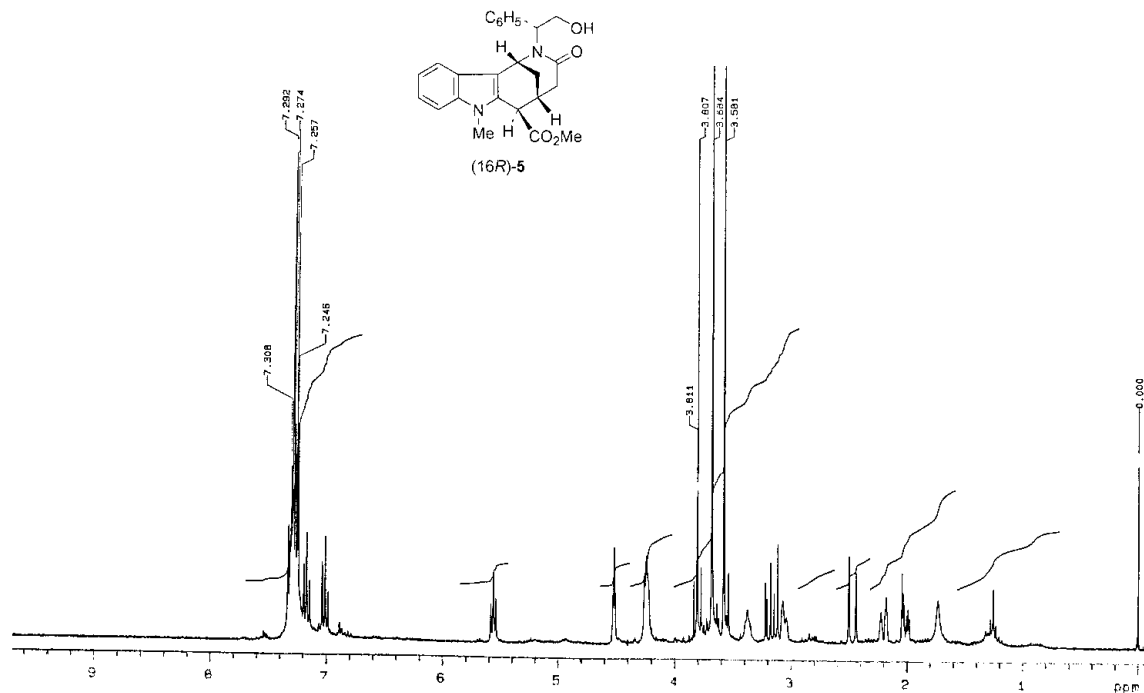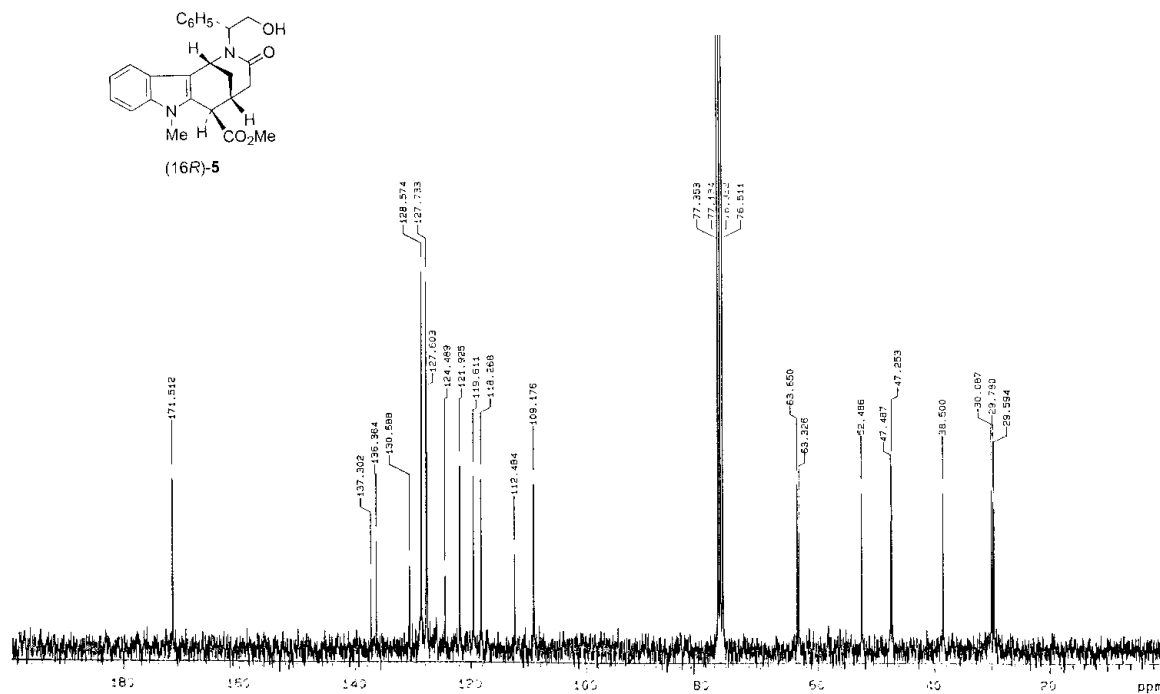

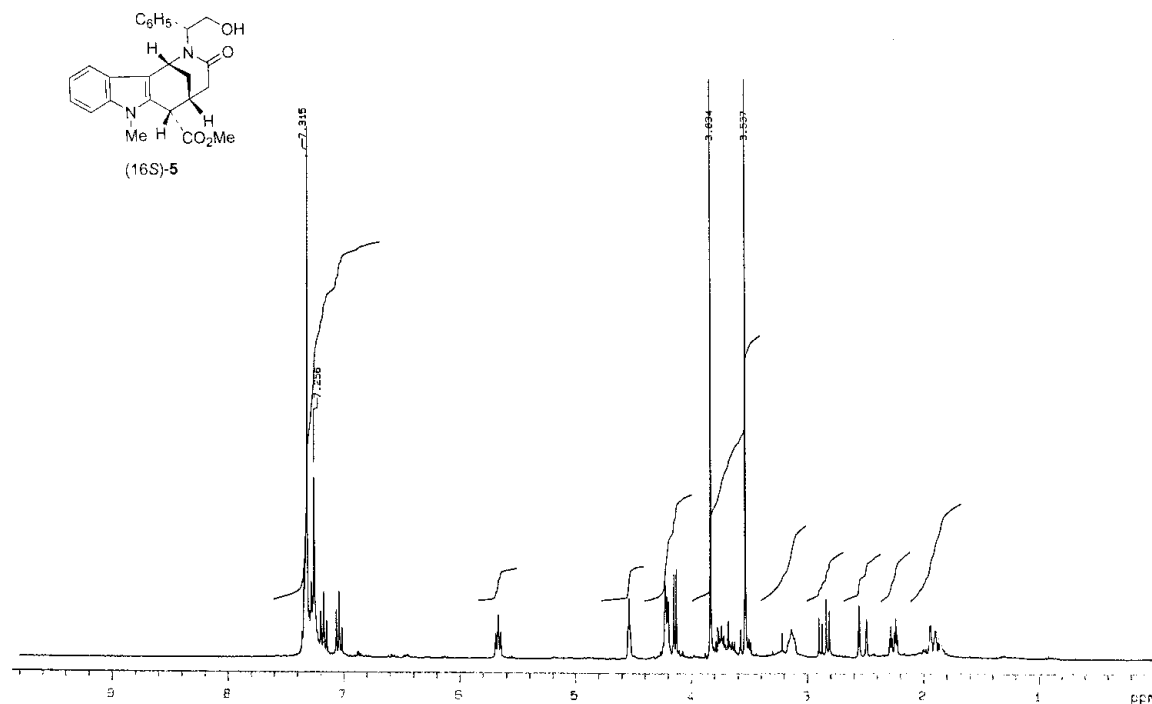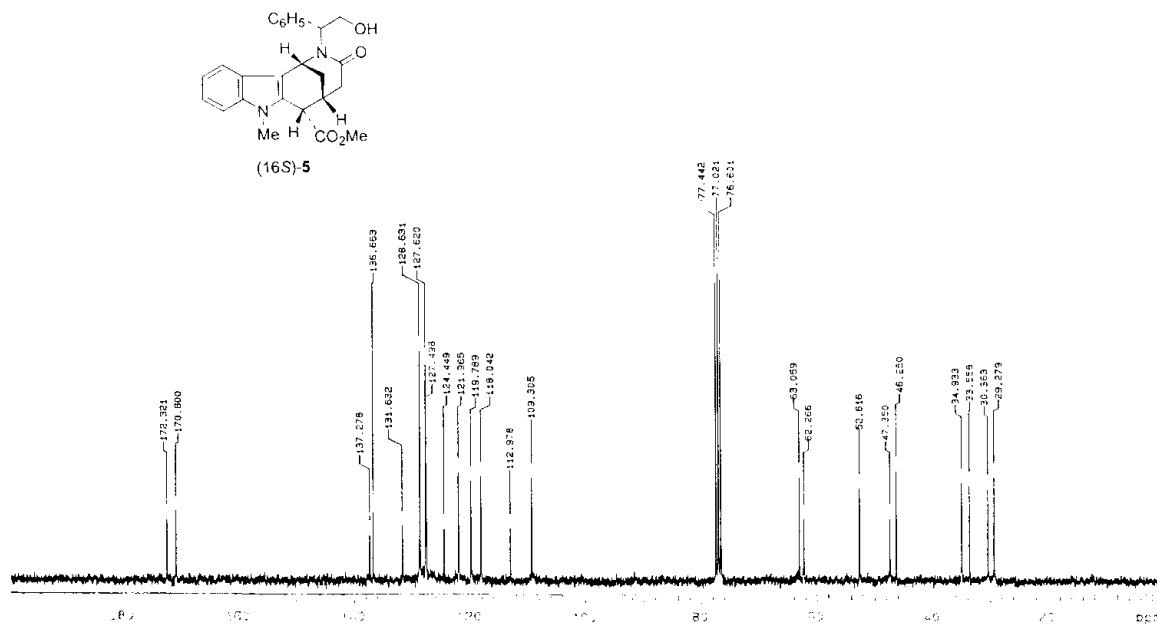

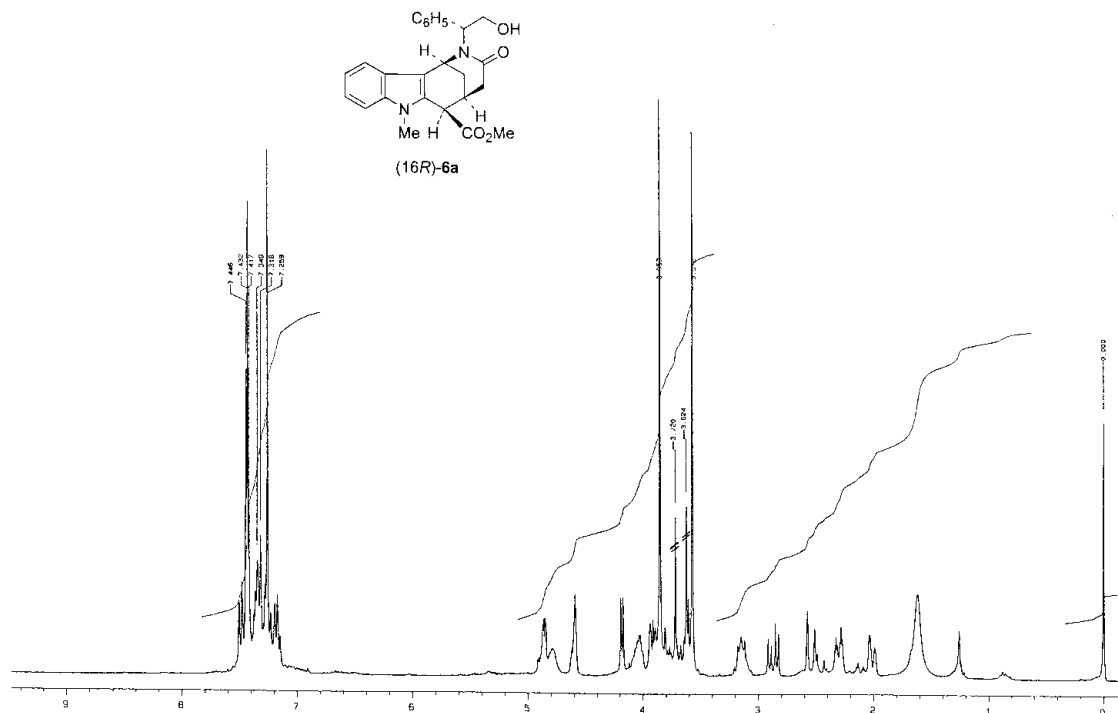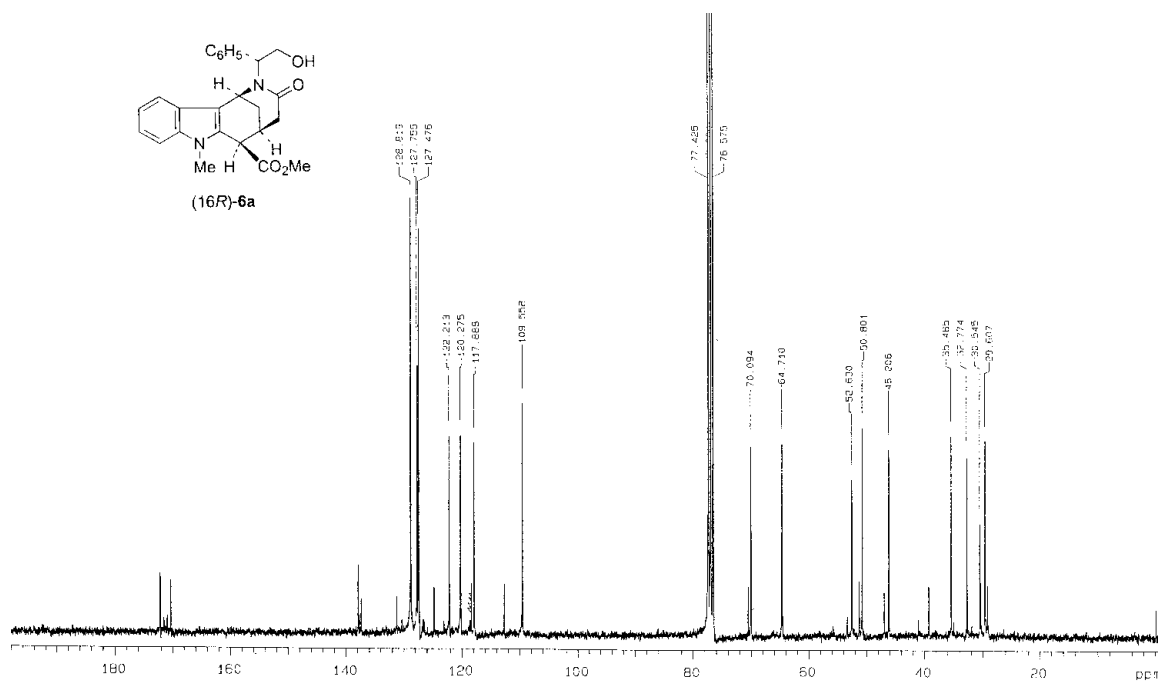

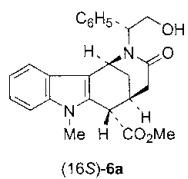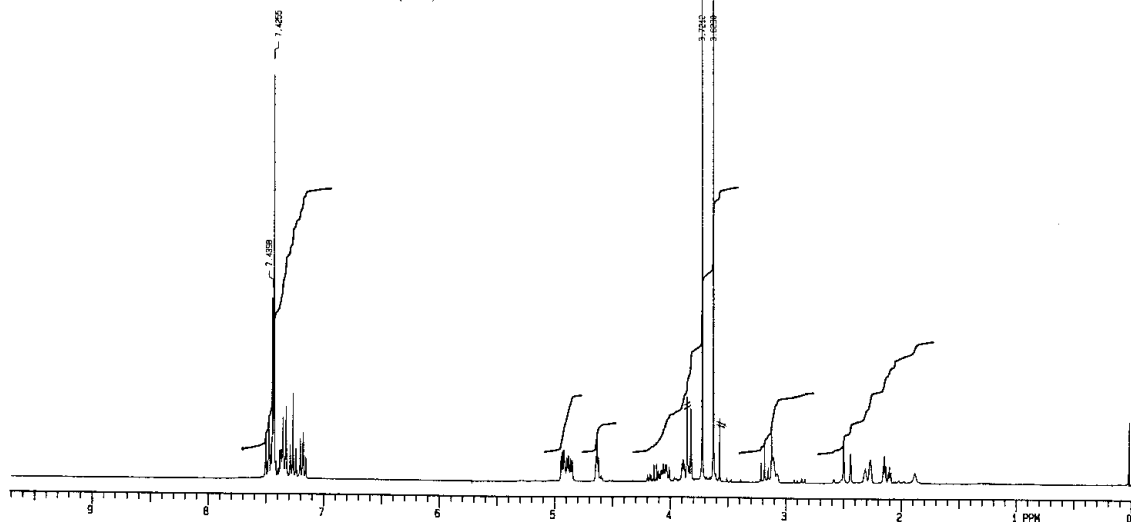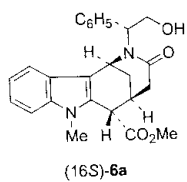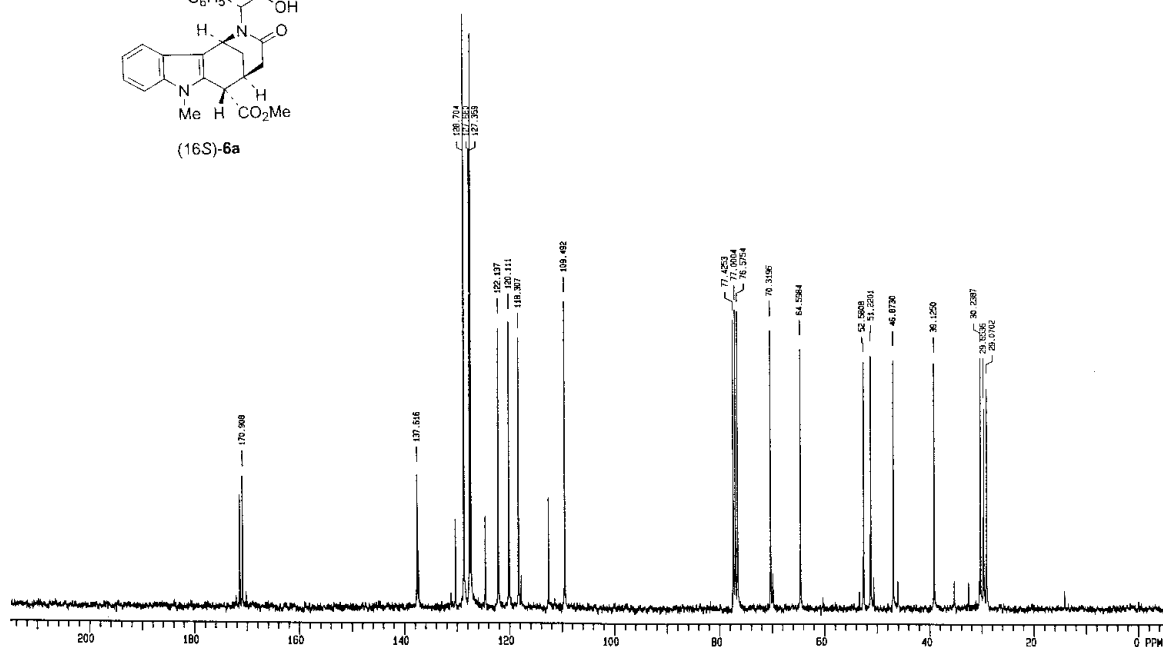

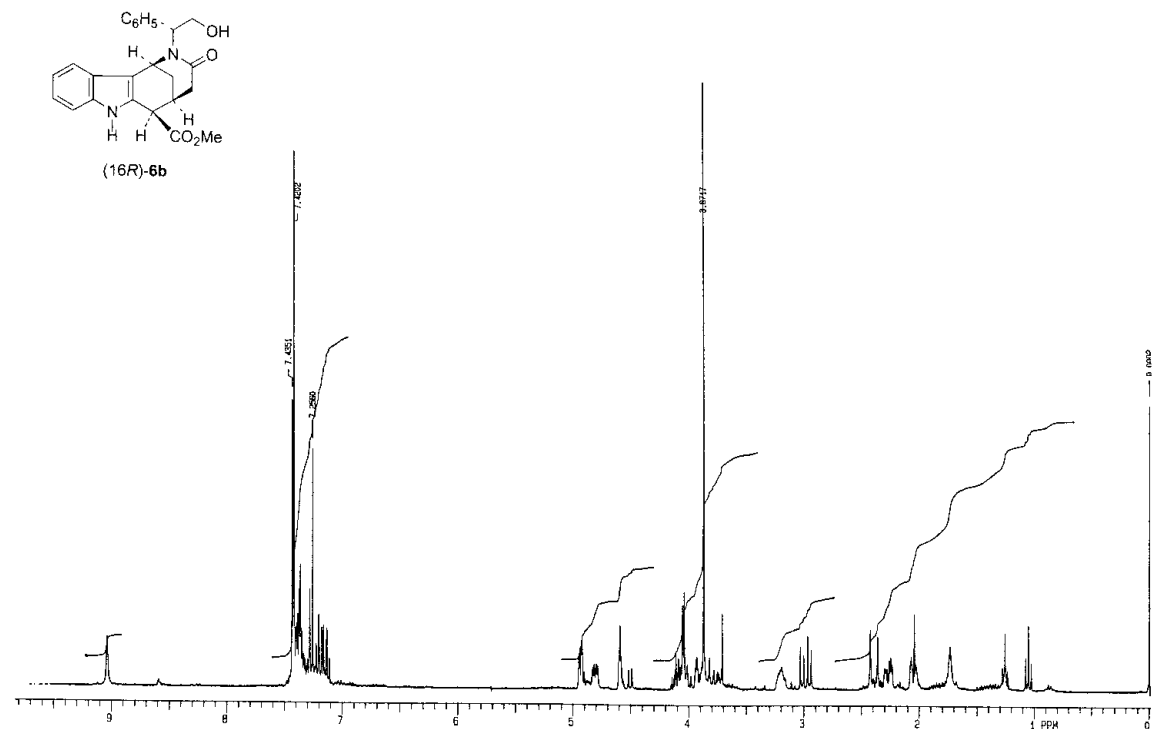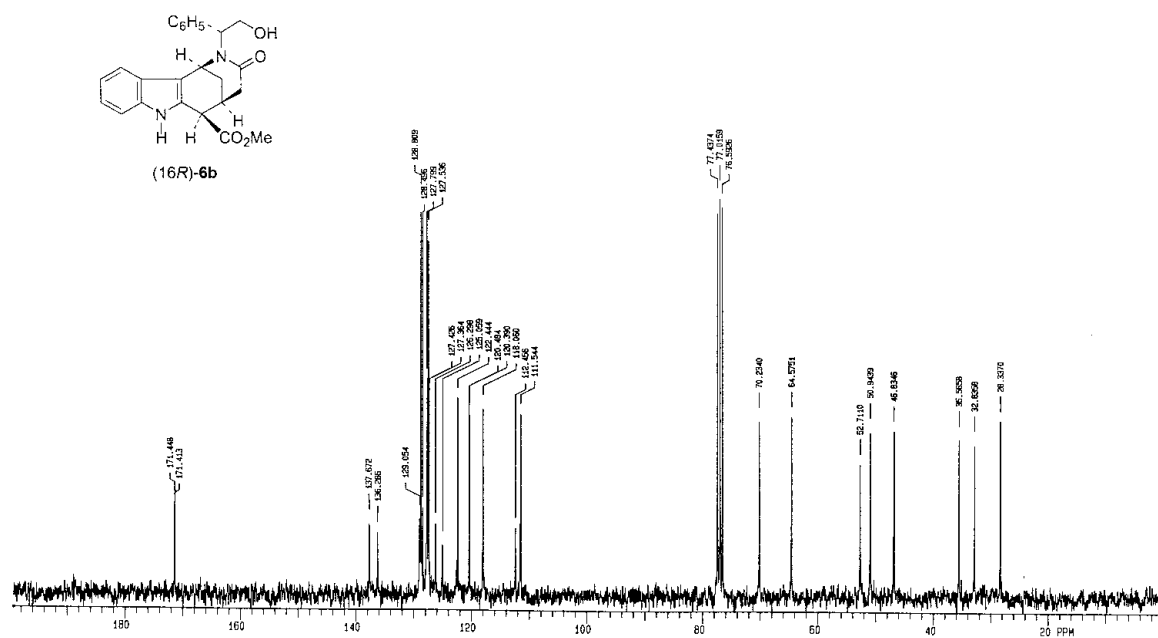

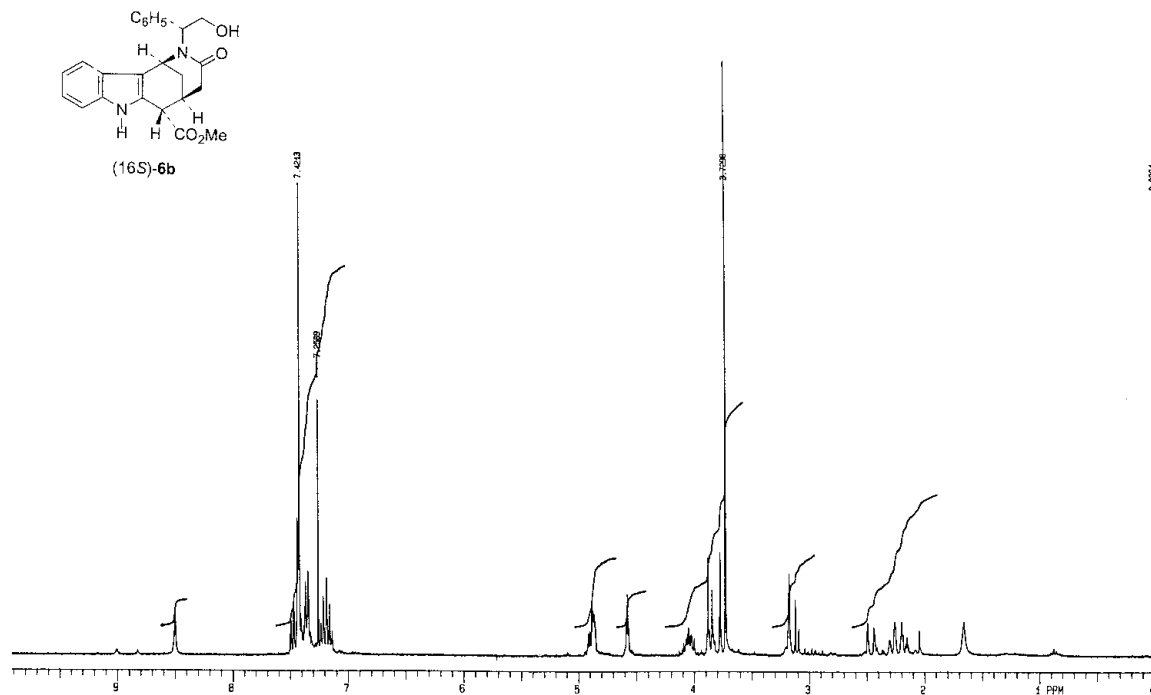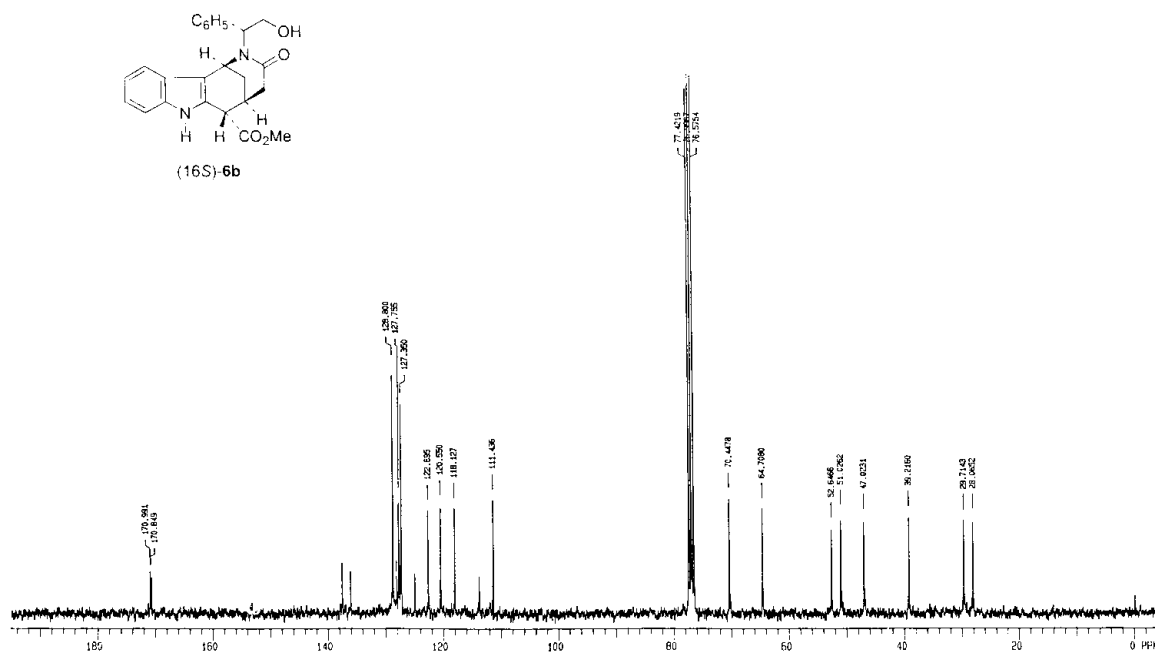

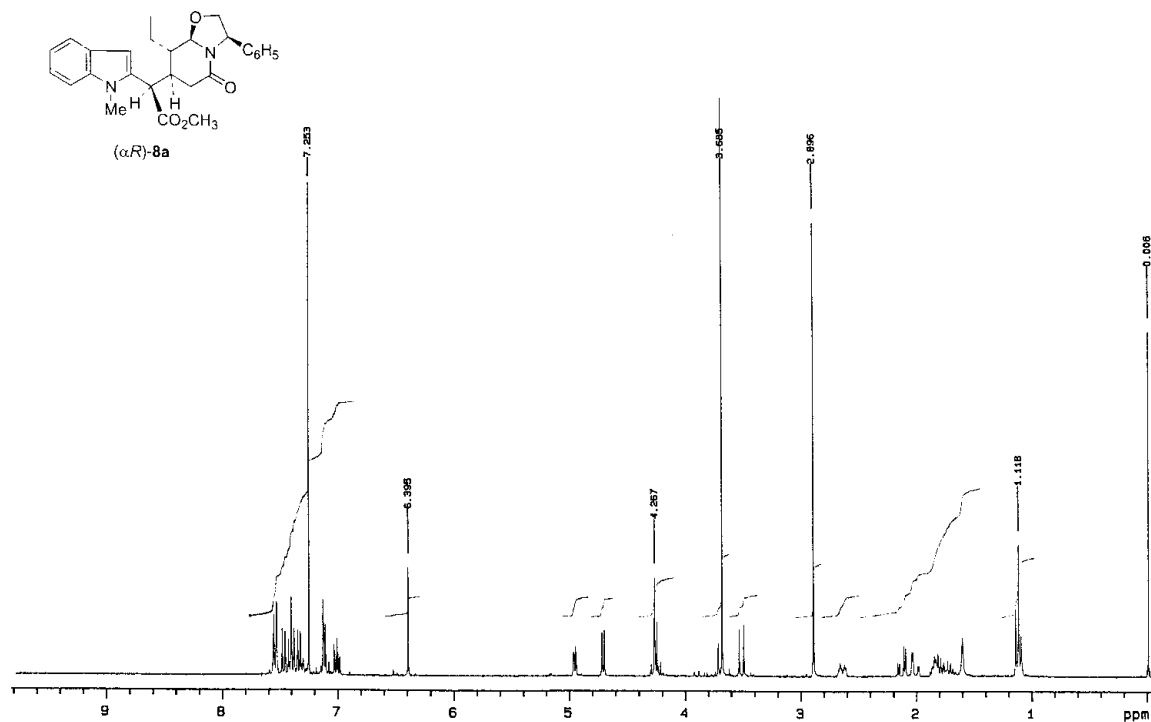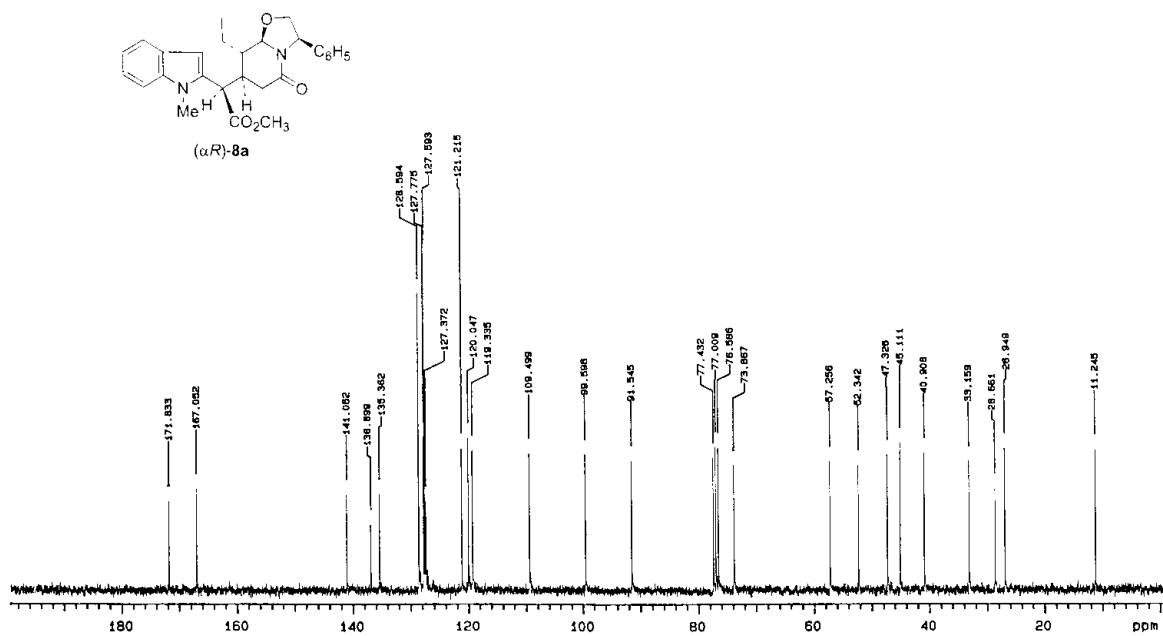

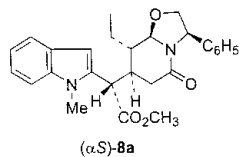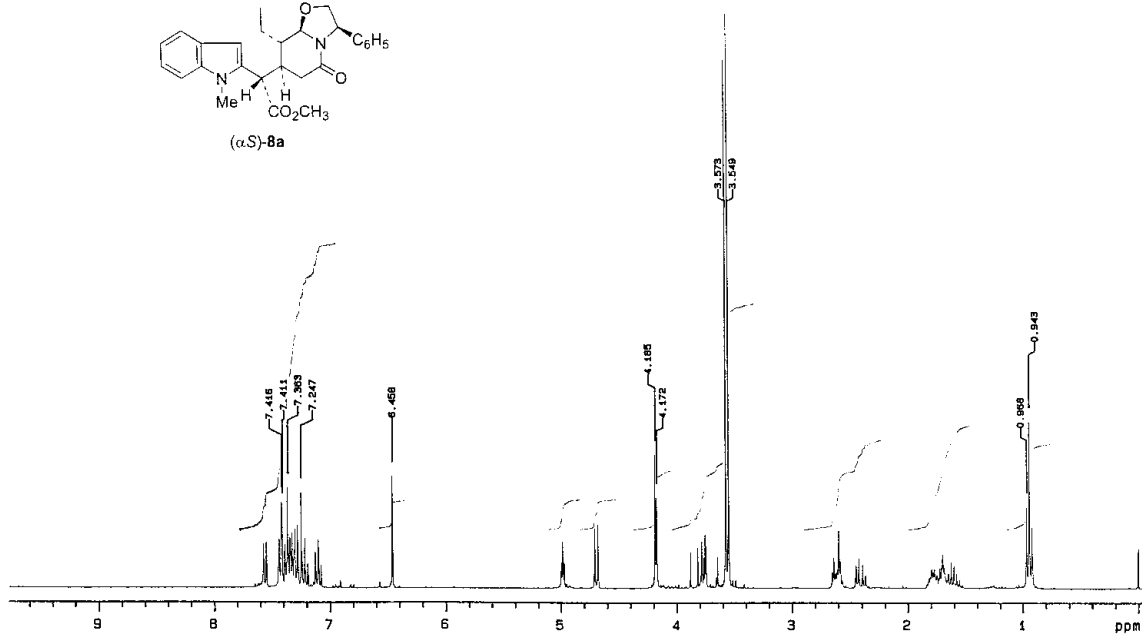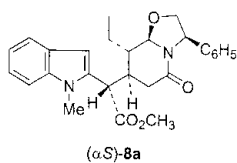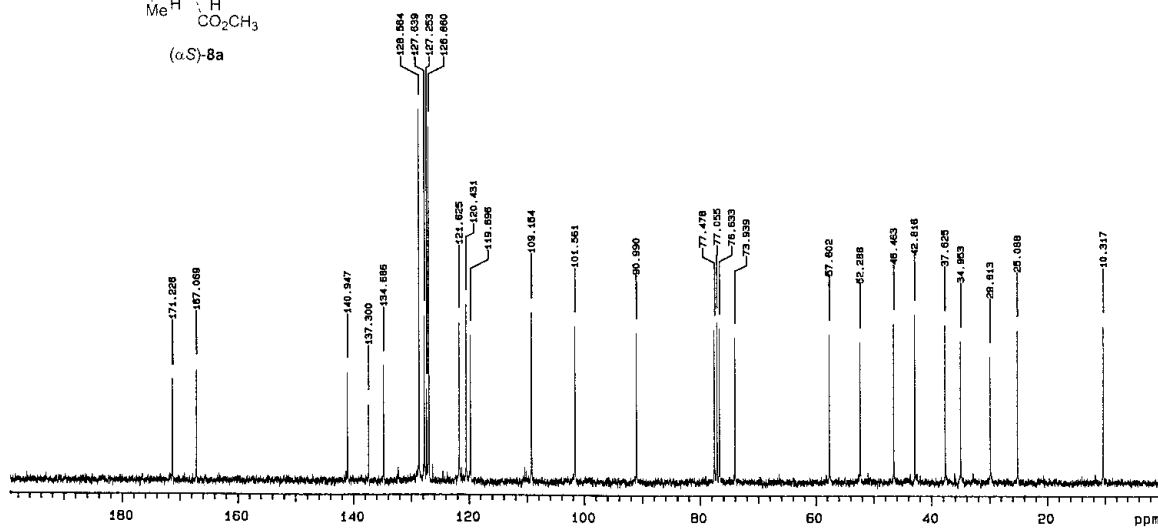



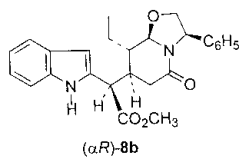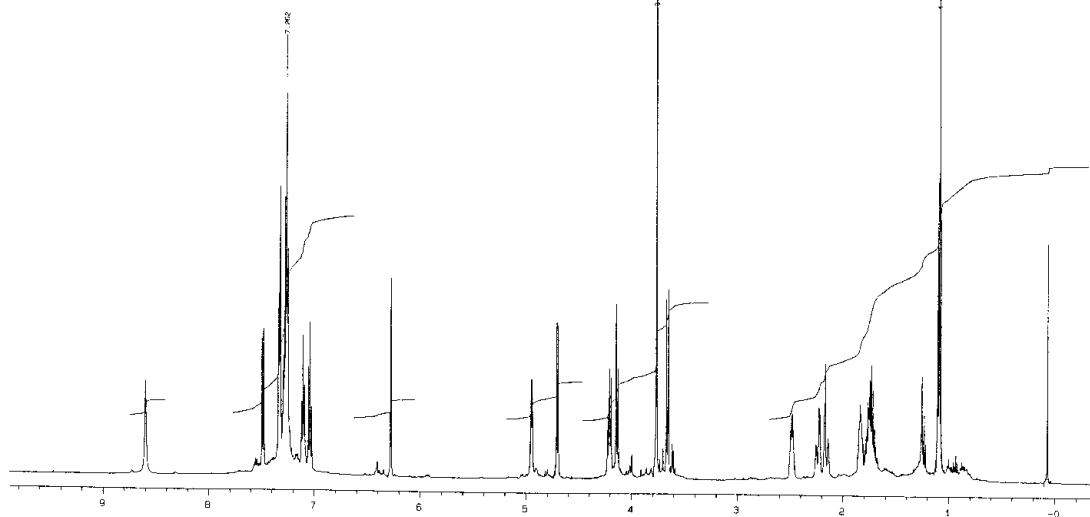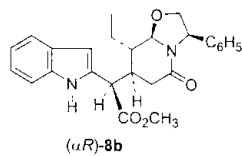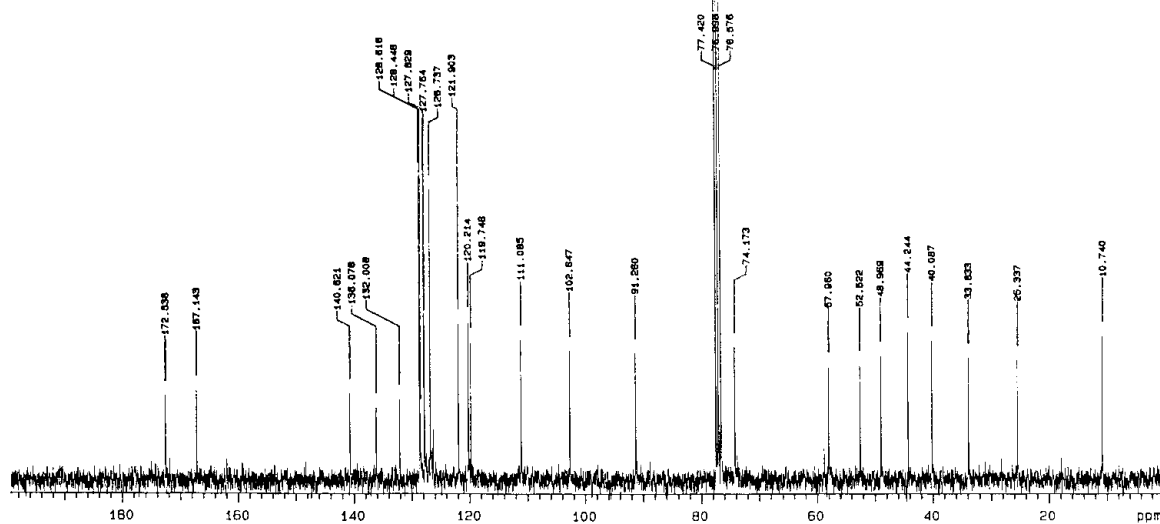

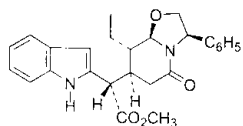

(*α*,*S*)-8b

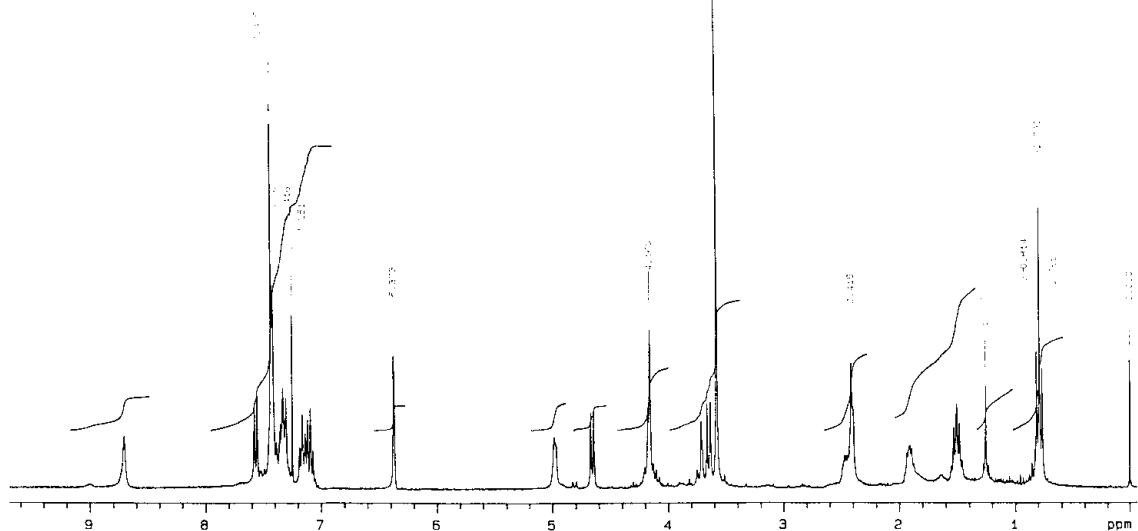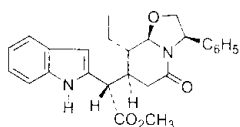

(*α*,*S*)-8b

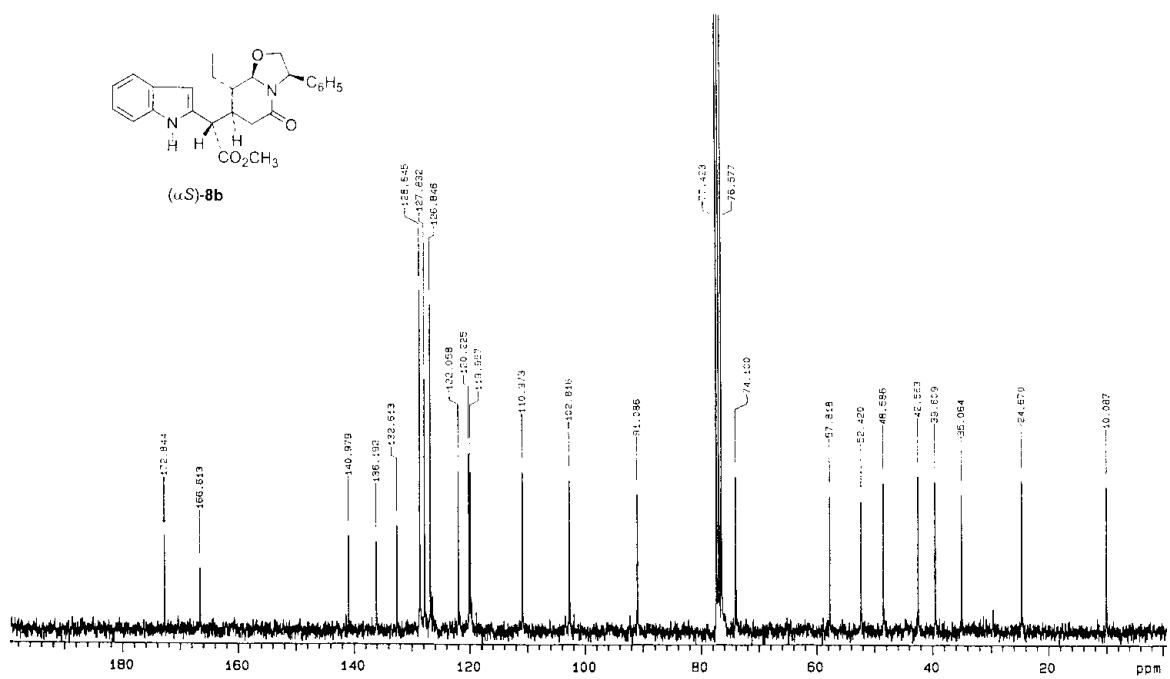

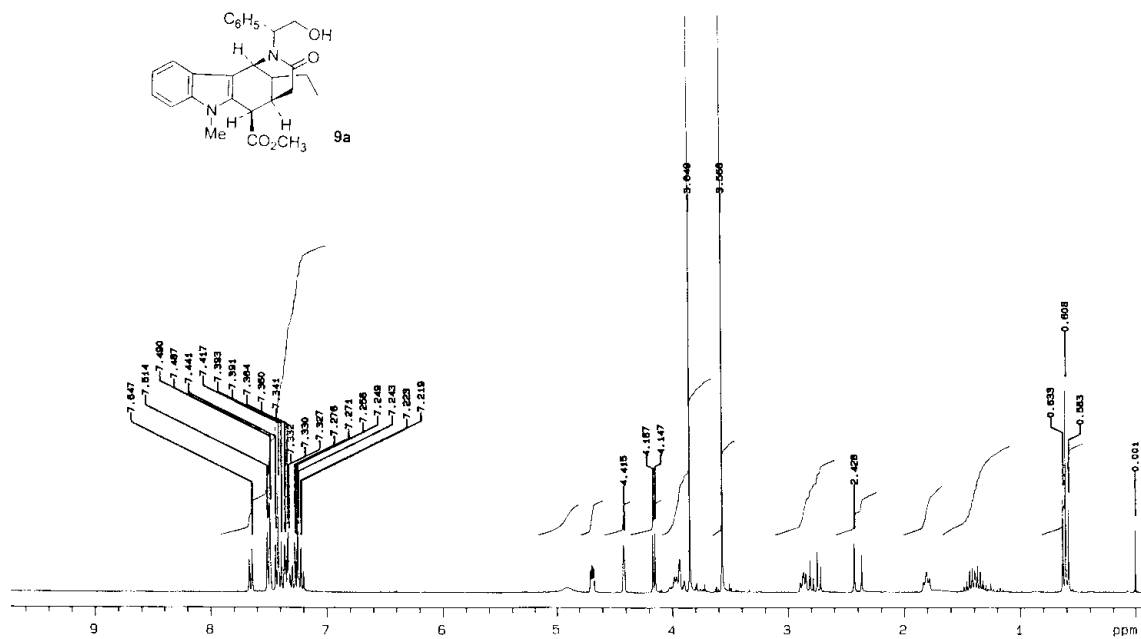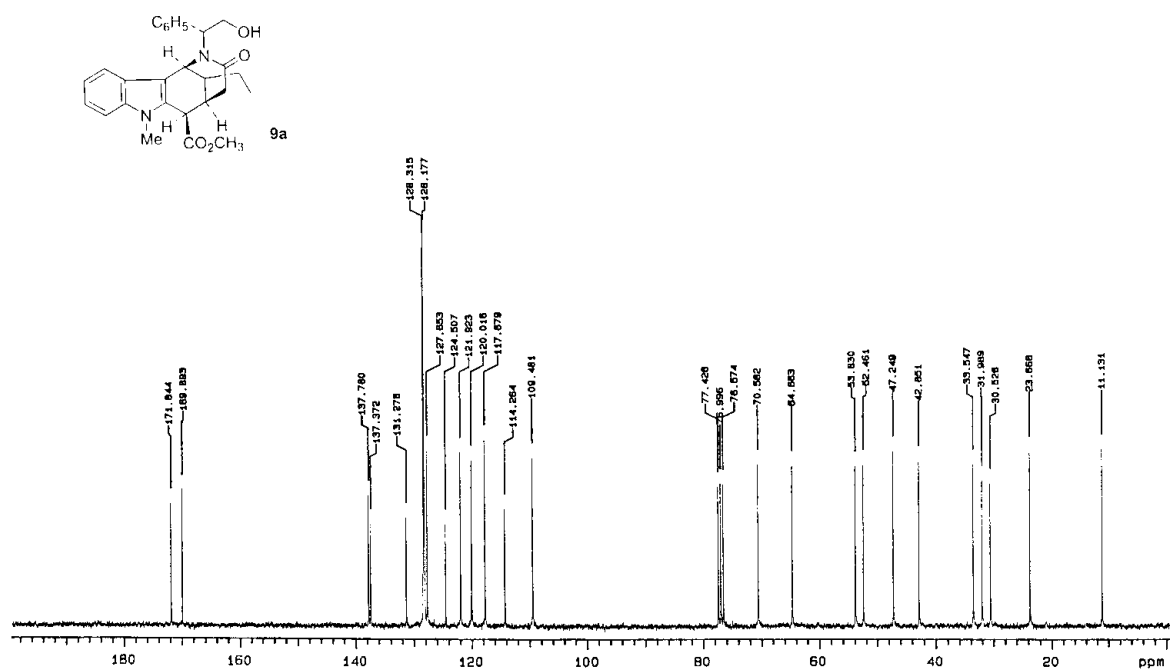

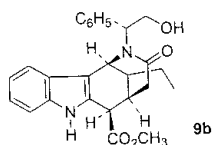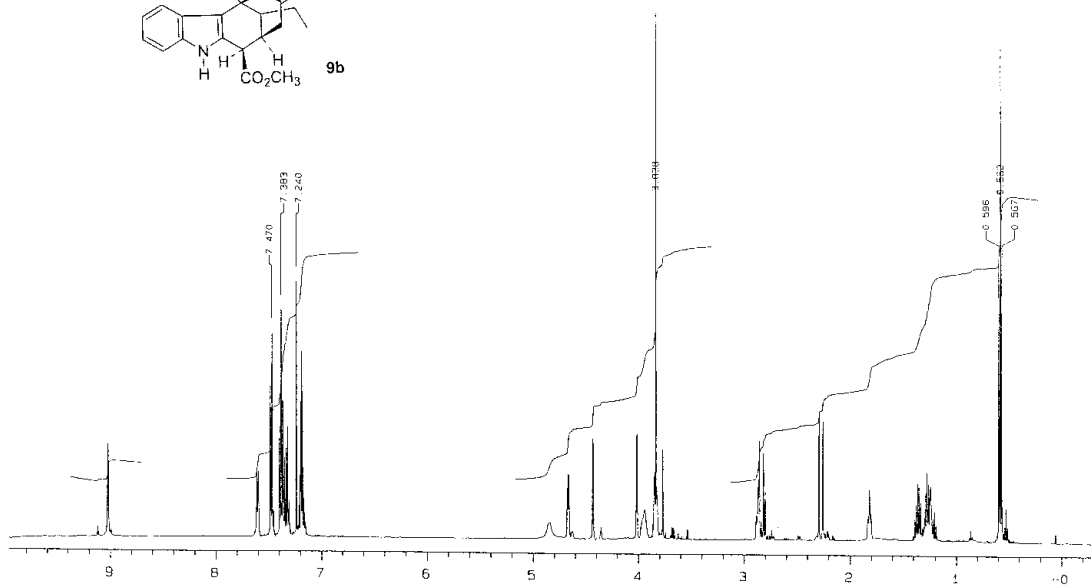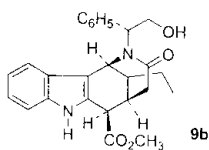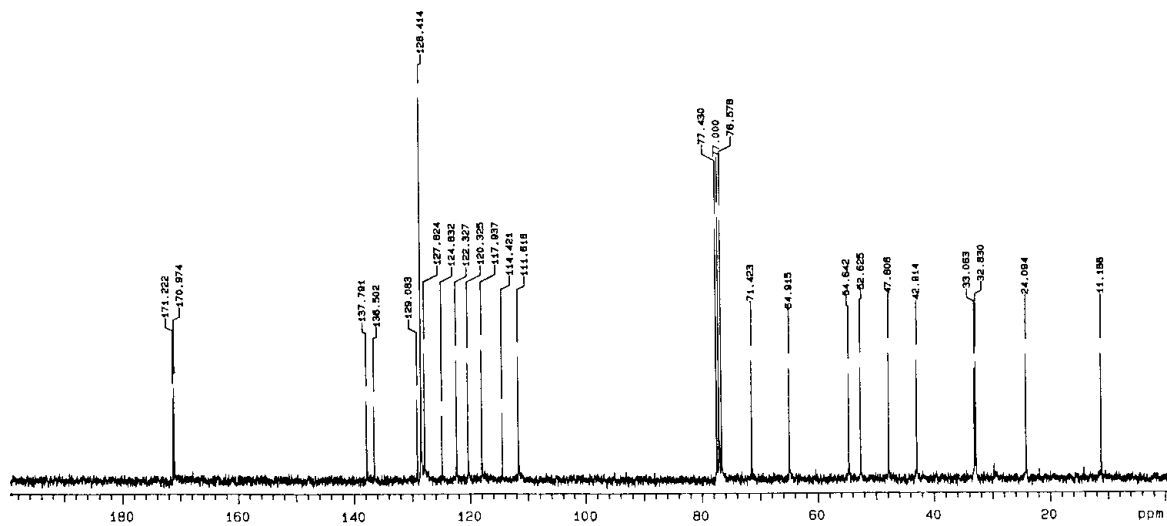

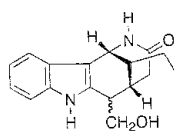

12 epimeric mixture

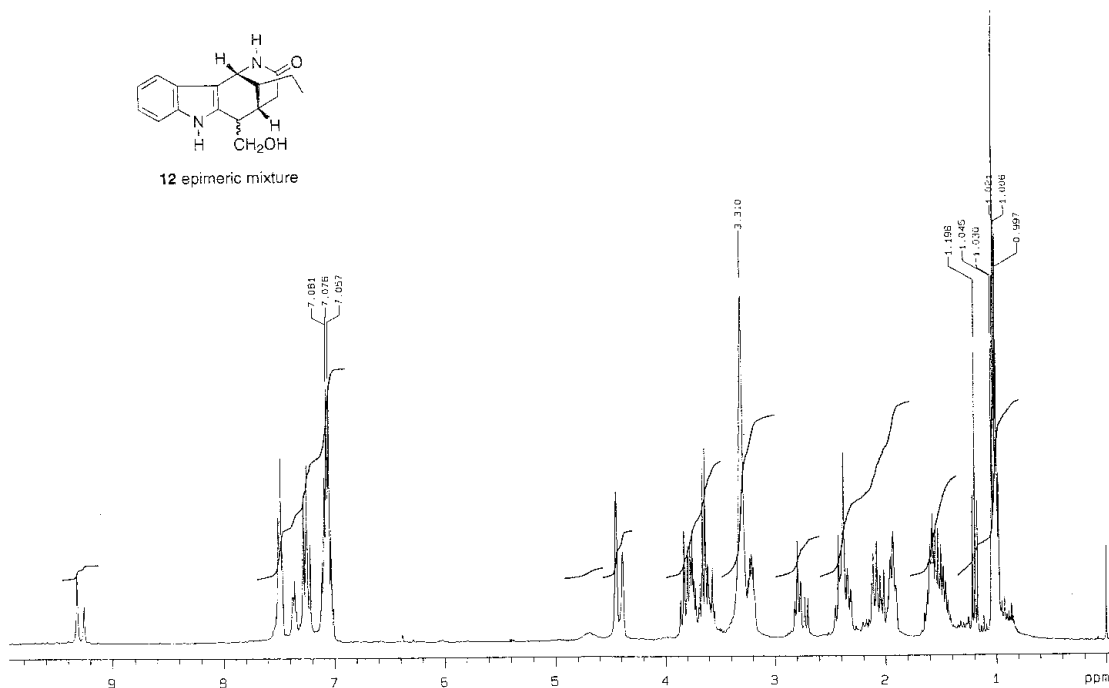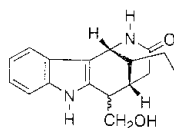

12 epimeric mixture

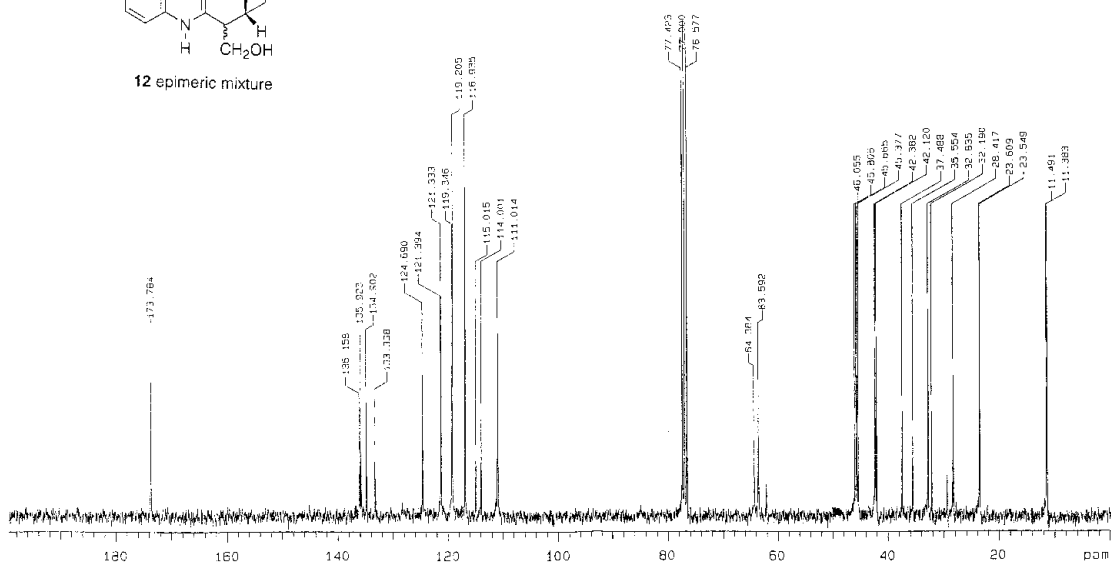

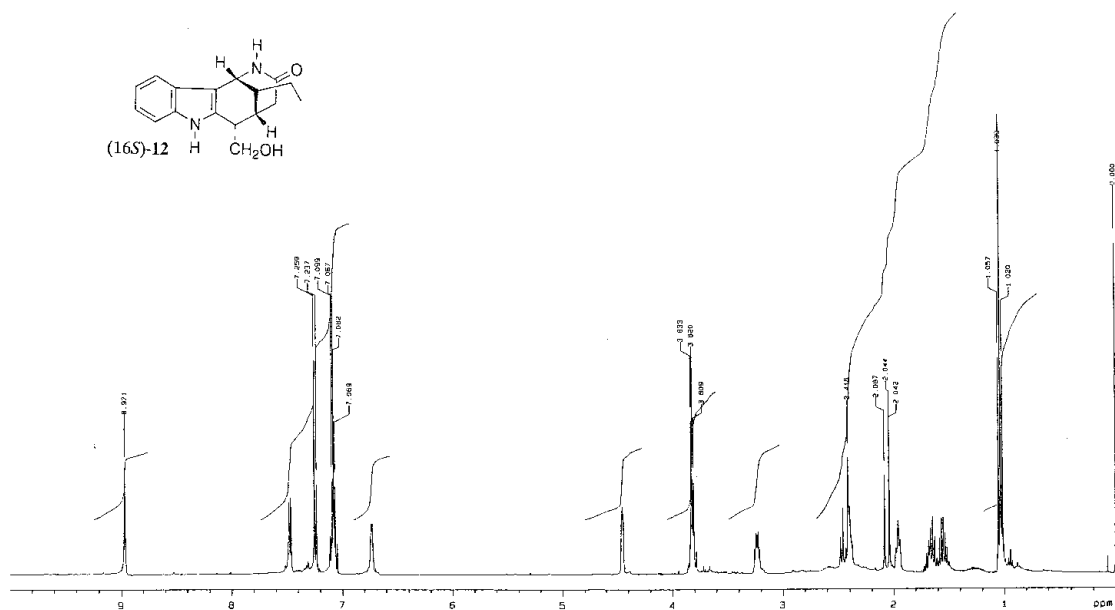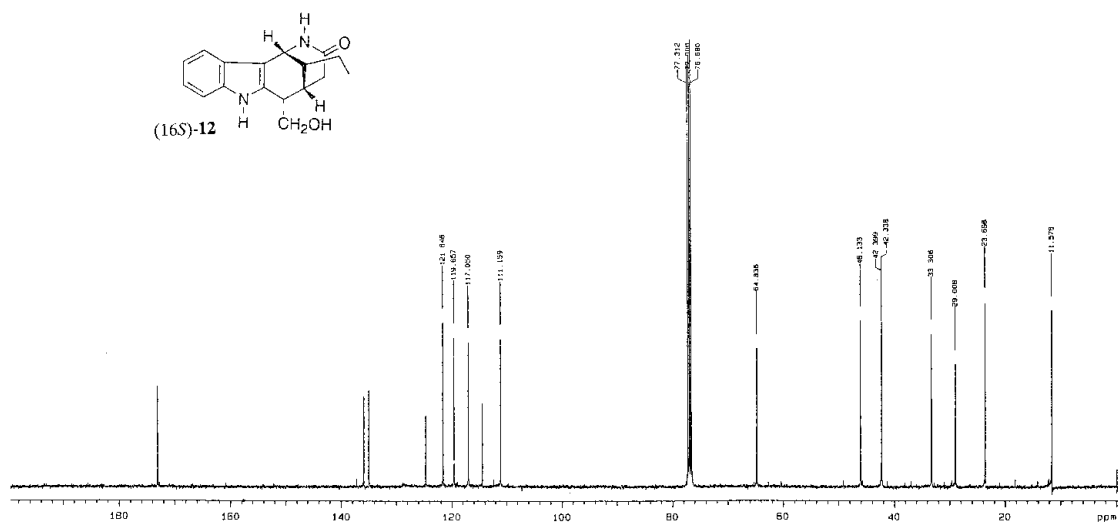

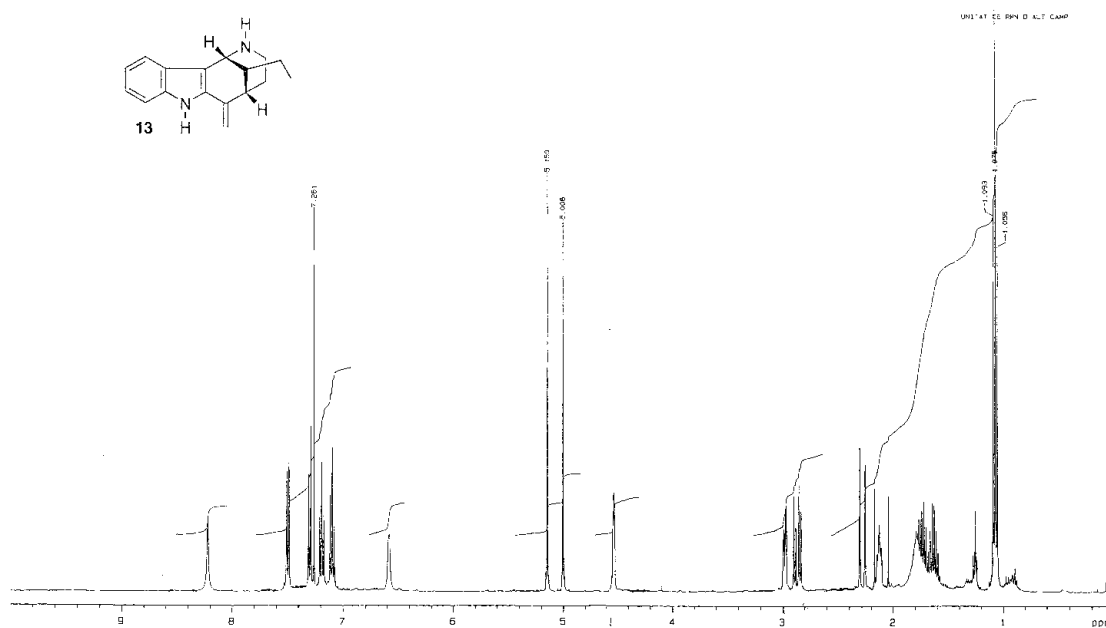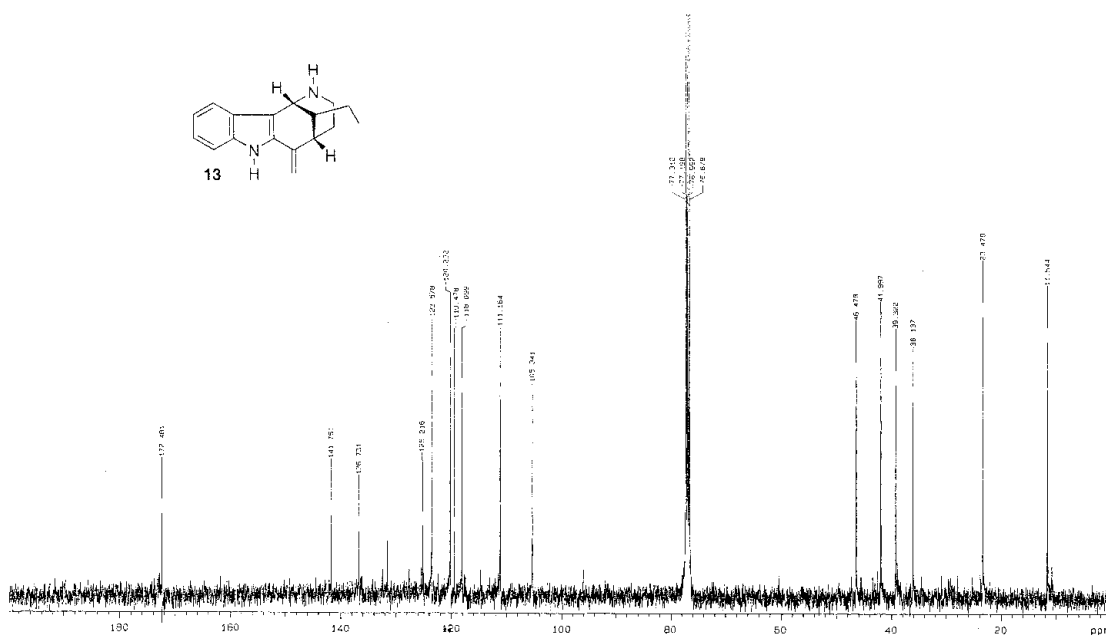

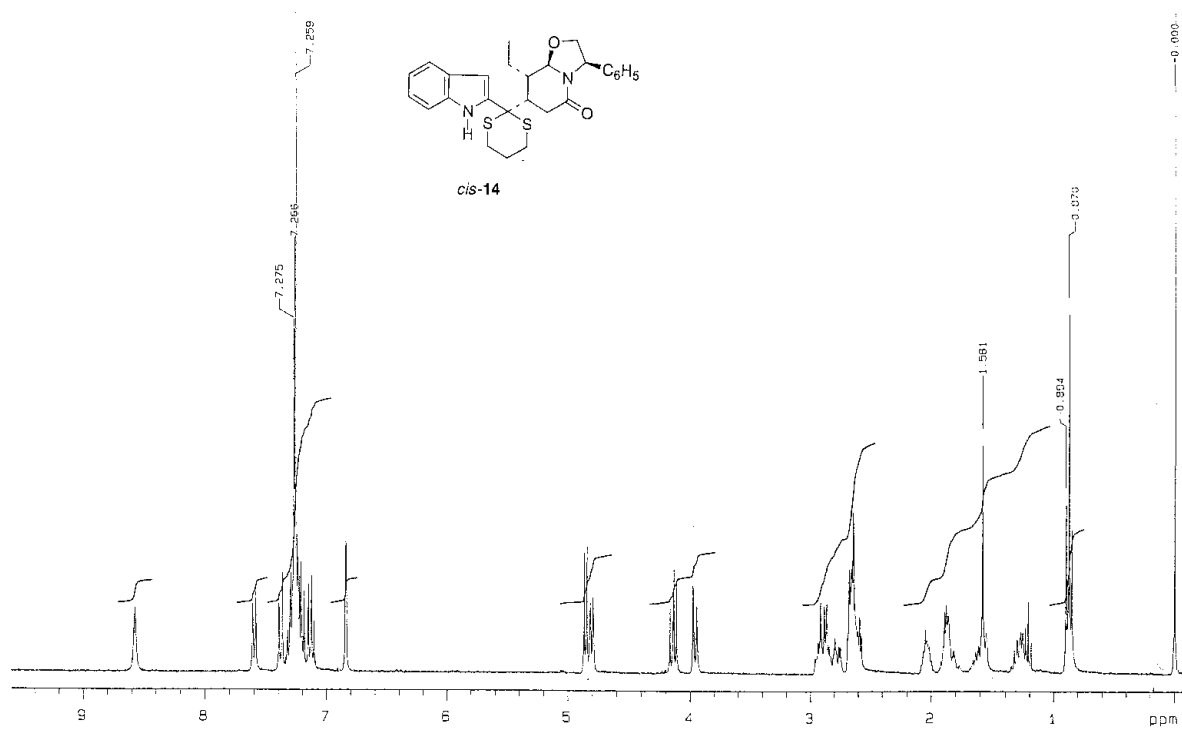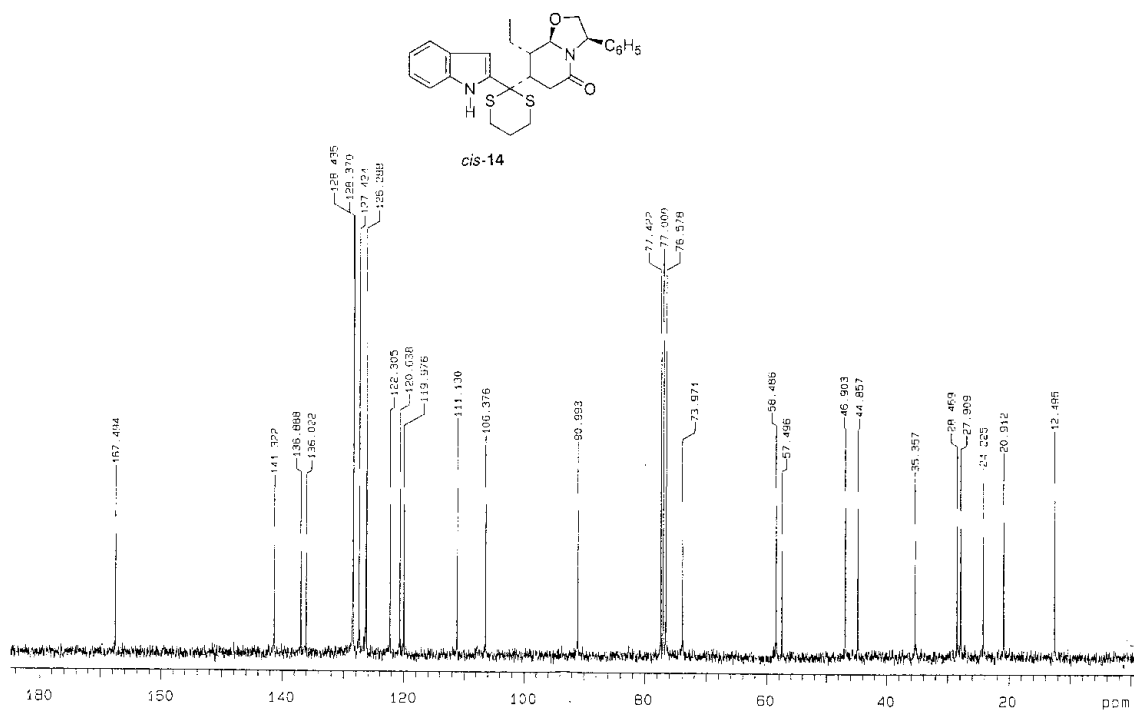



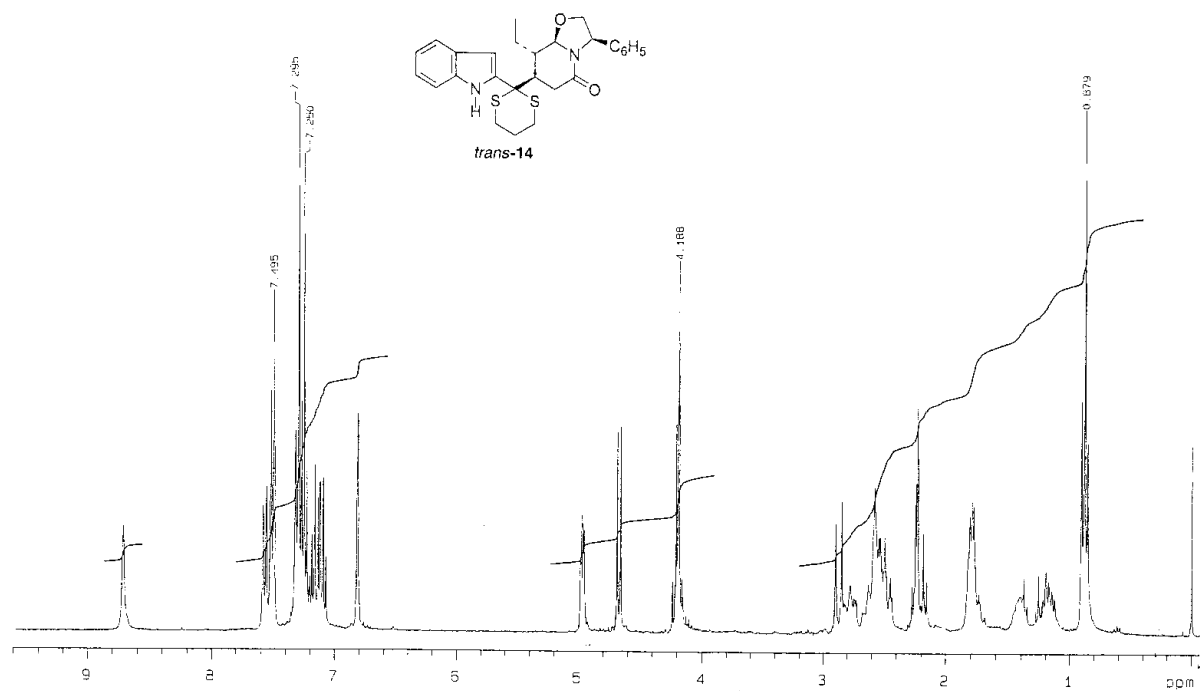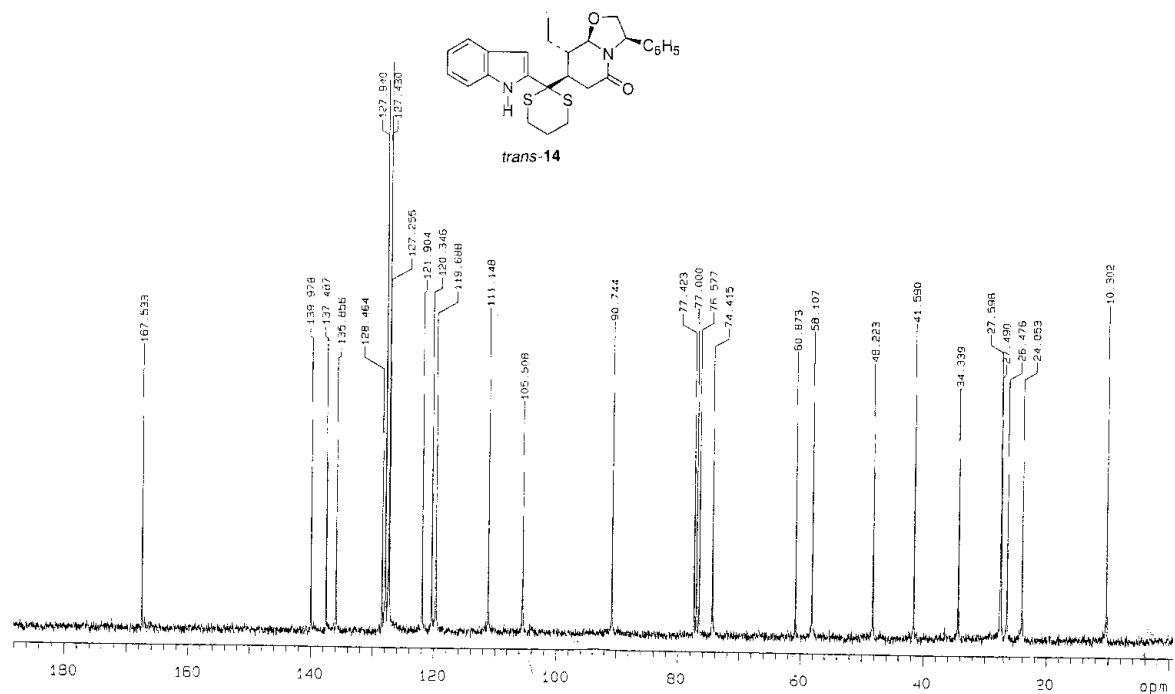

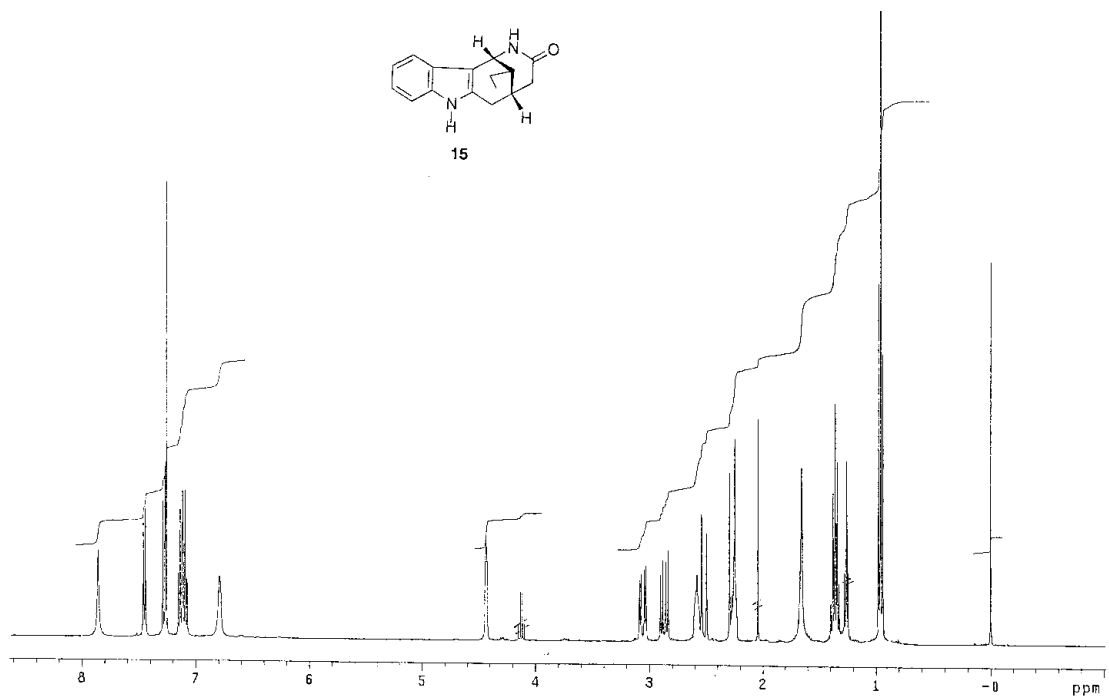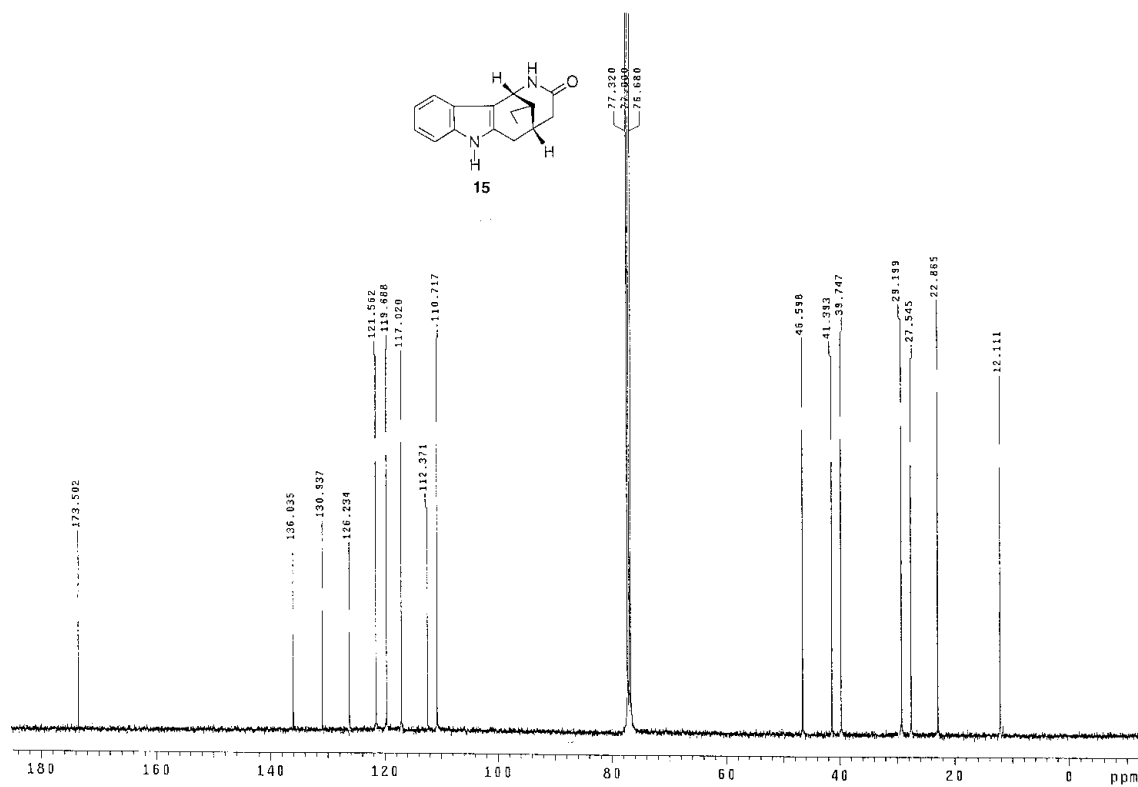

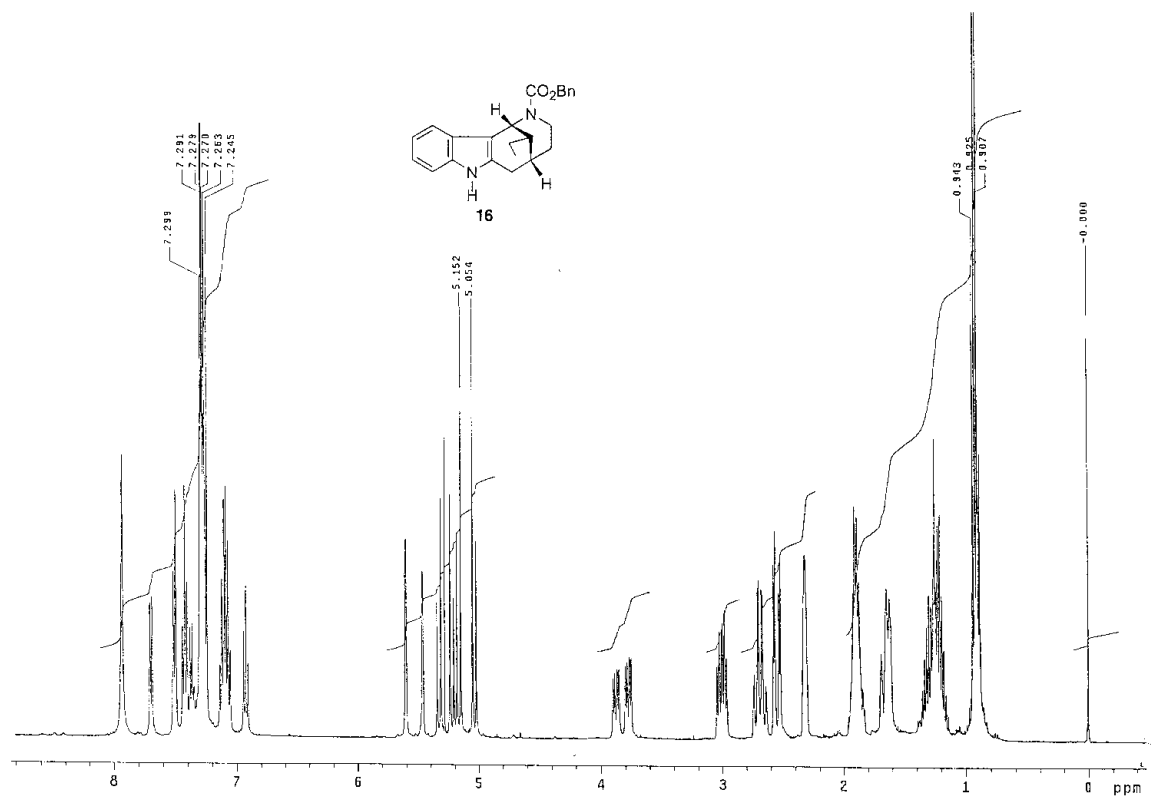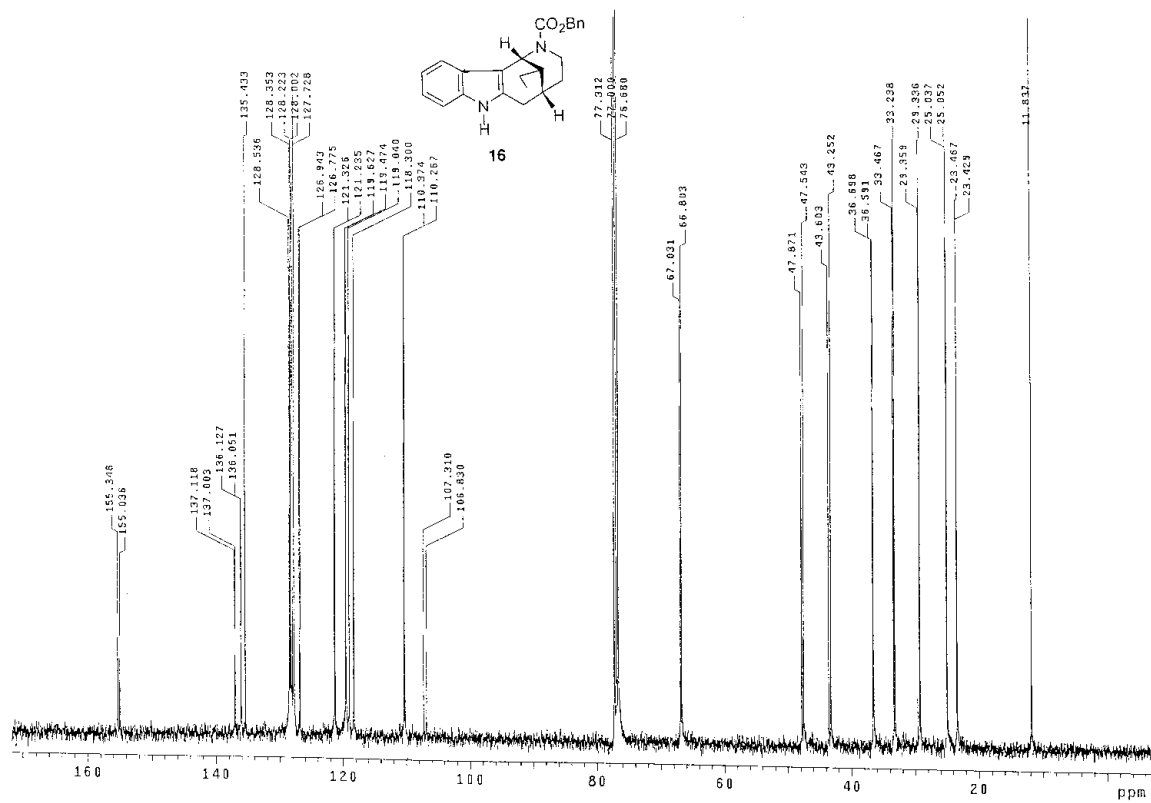

Supplement: b400987h.pdf [file b400987h.pdf]
